# Supplementary material for: Genetic modulation of the iris transillumination defect: a systems genetics analysis using the expanded family of BXD glaucoma strains
Source: PubMed Central journal article supplement (PMC3752936; doi:10.1111/pcmr.12106), 2013-04-13
Supplement: pcmr0026-0487-SD1.pdf [file pcmr0026-0487-SD1.pdf]

**Appendix 1: Summary of candidate genes**

| <b>Gene i.d.</b> | <b>Location</b>                                               | <b>Max LRS value and location</b>              | <b>Probe set i.d. and BLAT specificity</b> | <b>Markers flanking the gene</b>            | <b>Mean expression level</b> | <b>SNPs and Indels</b>                                                                                                                                                                                                                               |
|------------------|---------------------------------------------------------------|------------------------------------------------|--------------------------------------------|---------------------------------------------|------------------------------|------------------------------------------------------------------------------------------------------------------------------------------------------------------------------------------------------------------------------------------------------|
| <i>Tyrp1</i>     | Chr4: 80.492 Mb (80834123-80851719 bp) on the plus strand     | 76.91 (6-9 months, Figure 5C); Chr4: 78.698 Mb | 1415862_at; 2.5                            | rs3658567-76.484 Mb, rs3708061-80.950 Mb    | 12.798                       | <ul style="list-style-type: none"> <li>• 1 each non-synonymous SNPs on exons 2, 3 and 5</li> <li>• 1 each synonymous SNP on exon 4 and exon 6</li> <li>• 2 each 3'UTR SNPs</li> <li>• 46 SNPs at non-splice sites</li> <li>• 3 deletions</li> </ul>  |
| <i>Gpnm3</i>     | Chr6: 49.00 Mb (49036518-49058182 bp) on the plus strand      | 20.0 (>13 months, Figure 5J); Chr6: 48.92 Mb   | 1448303_at; 10.5                           | rs13478744-48.680 Mb, rs4225888-49.078 Mb   | 11.189                       | <ul style="list-style-type: none"> <li>• 1 non-synonymous SNP in exon 2</li> <li>• 1 stop codon in exon 4</li> <li>• 1 each synonymous SNP in exons 3, 4 and 10</li> <li>• 49 SNPs at non-splice sites</li> <li>• 2 deletions</li> </ul>             |
| <i>Oca2</i>      | Chr7: 63.791 Mb (56239760-56536517 bp) on the plus strand     | 12.5 (1-2 months, Figure 5F); Chr7: 60.128 Mb  | 1418211_at; 11.87                          | rs13479251-59.660 Mb, rs4137599-62.761 Mb   | 10.186                       | <ul style="list-style-type: none"> <li>• 3 SNPs in exon 1</li> <li>• 5 each 3' UTR SNPs</li> <li>• 1 each non-synonymous SNPs in exons 23 and 24</li> <li>• 960 SNPs at non-splice sites</li> <li>• 12 insertions</li> <li>• 13 deletions</li> </ul> |
| <i>Myo5a</i>     | Chr9: 75.065 Mb (75071015-75223688 bp) on the plus strand     | 10.6 (1-2 months, Figure 5F); Chr9: 74.735 Mb  | 1431320_a_at; 12.5                         | rs13480279- 74.382 Mb, rs3725904- 76.983 Mb | 8.938                        | <ul style="list-style-type: none"> <li>• 25 SNPs at non-splice sites</li> <li>• 17 insertions</li> <li>• 18 deletions</li> </ul>                                                                                                                     |
| <i>Prke2</i>     | Chr4: 154.634 Mb (155260120-155361391 bp) on the minus strand | 12.3 (1-2 months, Figure 5F); Chr4:155.23 Mb   | 1454902_at; 1.2                            | rs13478070-155.04 Mb, rs3720634-155.28 Mb   | 8.98                         | <ul style="list-style-type: none"> <li>• 1 non-synonymous SNP in exon 7</li> <li>• 1 3'UTR SNP</li> <li>• 9 SNPs at non-splice sites</li> </ul>                                                                                                      |
| <i>Zbtb20</i>    | Chr16: 43.623 Mb (43247284-43619128 bp) on the plus strand    | 10.7 (3-5 months, Figure 5G); Chr16: 41.688 Mb | 1439278_at; 11.7                           | rs4178244-41.340 Mb, rs4179378-43.943 Mb    | 10.719                       | <ul style="list-style-type: none"> <li>• 84 SNPs at non-splice sites</li> <li>• 3 non-synonymous exons in exon 8</li> <li>• 2 insertions</li> <li>• 2 deletions</li> </ul>                                                                           |
