# Supplementary material for: Genetic modulation of the iris transillumination defect: a systems genetics analysis using the expanded family of BXD glaucoma strains
Source: PubMed Central journal article supplement (PMC3752936; doi:10.1111/pcmr.12106), 2013-04-13
Supplement: pcmr0026-0487-SD2.pdf [file pcmr0026-0487-SD2.pdf]

**Appendix 2:** List of SNPs within *Tyrp1*

| SNP ID          | Mb        | ConScore | Domain 1 | Domain 2       | Function      | Details                                          | B6 | D2 |
|-----------------|-----------|----------|----------|----------------|---------------|--------------------------------------------------|----|----|
| wt37-4-80480728 | 80.480728 | 1        | Intron   | Nonsplice Site |               |                                                  | A  | G  |
| wt37-4-80480729 | 80.480729 | 1        | Intron   | Nonsplice Site |               |                                                  | G  | A  |
| wt37-4-80480743 | 80.480743 | 1        | Intron   | Nonsplice Site |               |                                                  | C  | A  |
| wt37-4-80481306 | 80.481306 | 1        | Exon 2   | Coding         | Nonsynonymous | Biotype: Protein Coding, C -> Y, tGt -> tAt, 110 | G  | A  |
| wt37-4-80481565 | 80.481565 |          | Intron   | Nonsplice Site |               |                                                  | G  | A  |
| wt37-4-80481748 | 80.481748 | 0.343    | Intron   | Nonsplice Site |               |                                                  | T  | C  |
| wt37-4-80481902 | 80.481902 | 0.343    | Intron   | Nonsplice Site |               |                                                  | C  | A  |
| wt37-4-80482143 | 80.482143 | 0.343    | Intron   | Nonsplice Site |               |                                                  | G  | A  |
| wt37-4-80482194 | 80.482194 | 0.343    | Intron   | Nonsplice Site |               |                                                  | T  | G  |
| wt37-4-80482339 | 80.482339 | 0.343    | Intron   | Nonsplice Site |               |                                                  | A  | G  |
| MRS1284850      | 80.482346 | 0.343    | Intron   | Nonsplice Site |               |                                                  | T  | A  |
| wt37-4-80482360 | 80.48236  | 0.343    | Intron   | Nonsplice Site |               |                                                  | A  | G  |
| wt37-4-80482396 | 80.482396 | 0.343    | Intron   | Nonsplice Site |               |                                                  | A  | G  |
| wt37-4-80485070 | 80.48507  | 1        | Intron   | Nonsplice Site |               |                                                  | G  | A  |
| wt37-4-80485287 | 80.485287 | 1        | Intron   | Nonsplice Site |               |                                                  | G  | A  |
| wt37-4-80485722 | 80.485722 | 1        | Intron   | Nonsplice Site |               |                                                  | C  | A  |
| wt37-4-80486306 | 80.486306 | 1        | Intron   | Nonsplice Site |               |                                                  | G  | A  |
| wt37-4-80486611 | 80.486611 | 1        | Exon 4   | Coding         | Synonymous    | Biotype: Protein Coding, F -> F, ttC -> ttT, 272 | C  | T  |
| wt37-4-80486799 | 80.486799 | 1        | Intron   | Nonsplice Site |               |                                                  | T  | C  |
| MRS1284859      | 80.486864 | 1        | Intron   | Nonsplice Site |               |                                                  | T  | A  |
| wt37-4-80486922 | 80.486922 | 1        | Intron   | Nonsplice Site |               |                                                  | T  | G  |
| wt37-4-80487104 | 80.487104 | 1        | Intron   | Nonsplice Site |               |                                                  | A  | G  |
| wt37-4-80487370 | 80.48737  | 1        | Intron   | Nonsplice Site |               |                                                  | T  | G  |
| wt37-4-80487386 | 80.487386 | 1        | Intron   | Nonsplice Site |               |                                                  | C  | G  |
| wt37-4-80487428 | 80.487428 | 1        | Intron   | Nonsplice Site |               |                                                  | A  | T  |
| wt37-4-80487574 | 80.487574 | 1        | Intron   | Nonsplice Site |               |                                                  | T  | C  |

|                 |           |       |        |                |               |                                                  |   |   |
|-----------------|-----------|-------|--------|----------------|---------------|--------------------------------------------------|---|---|
| wt37-4-80487575 | 80.487575 | 1     | Intron | Nonsplice Site |               |                                                  | C | T |
| MRS1284865      | 80.487578 | 1     | Intron | Nonsplice Site |               |                                                  | G | C |
| wt37-4-80487618 | 80.487618 | 0.766 | Intron | Nonsplice Site |               |                                                  | A | G |
| wt37-4-80487620 | 80.48762  | 0.766 | Intron | Nonsplice Site |               |                                                  | G | A |
| wt37-4-80487622 | 80.487622 | 0.766 | Intron | Nonsplice Site |               |                                                  | A | G |
| wt37-4-80487635 | 80.487635 | 0.766 | Intron | Nonsplice Site |               |                                                  | C | T |
| wt37-4-80487666 | 80.487666 | 0.766 | Intron | Nonsplice Site |               |                                                  | C | T |
| wt37-4-80487817 | 80.487817 | 0.766 | Intron | Nonsplice Site |               |                                                  | T | C |
| wt37-4-80488036 | 80.488036 | 0.14  | Intron | Nonsplice Site |               |                                                  | C | G |
| wt37-4-80488654 | 80.488654 | 0.84  | Intron | Nonsplice Site |               |                                                  | G | A |
| wt37-4-80489069 | 80.489069 | 0.84  | Intron | Nonsplice Site |               |                                                  | C | T |
| wt37-4-80490181 | 80.490181 | 0.972 | Intron | Nonsplice Site |               |                                                  | A | G |
| wt37-4-80490659 | 80.490659 | 1     | Intron | Nonsplice Site |               |                                                  | A | G |
| wt37-4-80490758 | 80.490758 | 1     | Exon 5 | Coding         | Nonsynonymous | Biotype: Protein Coding, R -> H, cGt -> cAt, 326 | G | A |
| wt37-4-80491480 | 80.49148  | 1     | Intron | Nonsplice Site |               |                                                  | C | T |
| wt37-4-80492644 | 80.492644 | 1     | Exon 6 | Coding         | Synonymous    | Biotype: Protein Coding, R -> R, agG -> agA, 417 | G | A |
| wt37-4-80492768 | 80.492768 | 0.993 | Intron | Nonsplice Site |               |                                                  | T | G |
| MRS1284879      | 80.49302  | 0.993 | Intron | Nonsplice Site |               |                                                  | A | G |
| wt37-4-80493240 | 80.49324  | 0.993 | Intron | Nonsplice Site |               |                                                  | G | C |
| wt37-4-80493631 | 80.493631 | 0.187 | Intron | Nonsplice Site |               |                                                  | T | A |
| wt37-4-80494781 | 80.494781 | 1     | Intron | Nonsplice Site |               |                                                  | G | A |
| wt37-4-80495077 | 80.495077 | 1     | Intron | Nonsplice Site |               |                                                  | T | A |
| wt37-4-80495422 | 80.495422 | 1     | Intron | Nonsplice Site |               |                                                  | T | C |
| wt37-4-80496370 | 80.49637  | 1     | Intron | Nonsplice Site |               |                                                  | G | A |
| wt37-4-80496794 | 80.496794 | 1     | Exon 3 | Coding         | Nonsynonymous | Biotype: Protein Coding, R -> H, cGc -> cAc, 140 | G | A |
| wt37-4-80496948 | 80.496948 | 1     | Exon   | 3' UTR         |               |                                                  | T | C |
| wt37-4-80497020 | 80.49702  | 1     | Exon   | 3' UTR         |               |                                                  | T | G |
