# Supplementary material for: Genetic modulation of the iris transillumination defect: a systems genetics analysis using the expanded family of BXD glaucoma strains
Source: PubMed Central journal article supplement (PMC3752936; doi:10.1111/pcmr.12106), 2013-04-13
Supplement: pcmr0026-0487-SD3.pdf [file pcmr0026-0487-SD3.pdf]

**Appendix 3:** List of SNPs within *Gpnm*

| SNP ID          | Mb        | ConScore | Domain 1 | Domain 2       | Function      | Details                                         | B6 | D2 |
|-----------------|-----------|----------|----------|----------------|---------------|-------------------------------------------------|----|----|
| wt37-6-48987092 | 48.987092 | 1        | Intron   | Nonsplice Site |               |                                                 | C  | T  |
| wt37-6-48987483 | 48.987483 | 1        | Intron   | Nonsplice Site |               |                                                 | G  | A  |
| wt37-6-48987502 | 48.987502 | 1        | Intron   | Nonsplice Site |               |                                                 | T  | C  |
| wt37-6-48987659 | 48.987659 | 1        | Intron   | Nonsplice Site |               |                                                 | T  | C  |
| wt37-6-48988396 | 48.988396 | 0.786    | Intron   | Nonsplice Site |               |                                                 | C  | A  |
| wt37-6-48988911 | 48.988911 | 0.786    | Intron   | Nonsplice Site |               |                                                 | T  | C  |
| wt37-6-48988953 | 48.988953 | 0.786    | Intron   | Nonsplice Site |               |                                                 | G  | T  |
| wt37-6-48989072 | 48.989072 | 0.786    | Intron   | Nonsplice Site |               |                                                 | C  | T  |
| wt37-6-48989074 | 48.989074 | 0.786    | Intron   | Nonsplice Site |               |                                                 | A  | T  |
| wt37-6-48989302 | 48.989302 | 0.786    | Intron   | Nonsplice Site |               |                                                 | A  | G  |
| wt37-6-48990254 | 48.990254 | 0.936    | Intron   | Nonsplice Site |               |                                                 | C  | T  |
| wt37-6-48990837 | 48.990837 | 0.422    | Intron   | Nonsplice Site |               |                                                 | A  | G  |
| wt37-6-48991322 | 48.991322 |          | Intron   | Nonsplice Site |               |                                                 | A  | G  |
| wt37-6-48991336 | 48.991336 |          | Intron   | Nonsplice Site |               |                                                 | A  | T  |
| wt37-6-48991901 | 48.991901 | 0.202    | Intron   | Nonsplice Site |               |                                                 | T  | C  |
| wt37-6-48992050 | 48.99205  | 0.202    | Intron   | Nonsplice Site |               |                                                 | G  | A  |
| wt37-6-48992571 | 48.992571 | 1        | Intron   | Nonsplice Site |               |                                                 | A  | G  |
| wt37-6-48992801 | 48.992801 | 1        | Exon 2   | Coding         | Nonsynonymous | Biotype: Protein Coding, D -> N, Gat -> Aat, 36 | G  | A  |
| wt37-6-48993476 | 48.993476 | 1        | Intron   | Nonsplice Site |               |                                                 | G  | A  |
| wt37-6-48993742 | 48.993742 | 1        | Intron   | Nonsplice Site |               |                                                 | C  | T  |
| wt37-6-48993788 | 48.993788 | 1        | Intron   | Nonsplice Site |               |                                                 | G  | T  |
| wt37-6-48993792 | 48.993792 | 1        | Intron   | Nonsplice Site |               |                                                 | T  | G  |
| wt37-6-48994057 | 48.994057 | 1        | Exon 3   | Coding         | Synonymous    | Biotype: Protein Coding, T -> T, acT -> acC, 95 | T  | C  |
| wt37-6-48994496 | 48.994496 | 1        | Intron   | Nonsplice Site |               |                                                 | T  | C  |
| wt37-6-48994558 | 48.994558 | 1        | Intron   | Nonsplice Site |               |                                                 | T  | C  |
| wt37-6-48994588 | 48.994588 | 1        | Intron   | Nonsplice Site |               |                                                 | A  | C  |
| wt37-6-48995223 | 48.995223 | 1        | Intron   | Nonsplice Site |               |                                                 | G  | A  |

|                 |           |       |         |                |             |                                                  |   |   |
|-----------------|-----------|-------|---------|----------------|-------------|--------------------------------------------------|---|---|
| MRS1748503      | 48.995317 | 1     | Exon 4  | Coding         | Synonymous  | Biotype: Protein Coding, T -> T, acA -> acC, 127 | A | C |
| wt37-6-48995384 | 48.995384 | 1     | Exon 4  | Coding         | Stop Gained | Biotype: Protein Coding, R -> *, Cga -> Tga, 150 | C | T |
| MRS1748505      | 48.995534 | 1     | Intron  | Nonsplice Site |             |                                                  | T | G |
| wt37-6-48996593 | 48.996593 | 1     | Intron  | Nonsplice Site |             |                                                  | A | C |
| MRS1748507      | 48.996667 | 1     | Intron  | Nonsplice Site |             |                                                  | C | A |
| wt37-6-48998592 | 48.998592 | 0.467 | Intron  | Nonsplice Site |             |                                                  | G | A |
| wt37-6-48999520 | 48.99952  |       | Intron  | Nonsplice Site |             |                                                  | T | G |
| wt37-6-49000199 | 49.000199 |       | Intron  | Nonsplice Site |             |                                                  | A | G |
| wt37-6-49001157 | 49.001157 | 1     | Intron  | Nonsplice Site |             |                                                  | A | G |
| wt37-6-49002202 | 49.002202 | 1     | Intron  | Nonsplice Site |             |                                                  | G | A |
| wt37-6-49002349 | 49.002349 | 0.971 | Intron  | Nonsplice Site |             |                                                  | C | G |
| wt37-6-49002626 | 49.002626 | 0.971 | Intron  | Nonsplice Site |             |                                                  | A | G |
| wt37-6-49003562 | 49.003562 | 0.901 | Intron  | Nonsplice Site |             |                                                  | A | C |
| MRS1748517      | 49.004565 |       | Intron  | Nonsplice Site |             |                                                  | G | A |
| wt37-6-49004930 | 49.00493  | 0.557 | Intron  | Nonsplice Site |             |                                                  | G | A |
| wt37-6-49005229 | 49.005229 | 0.557 | Intron  | Nonsplice Site |             |                                                  | A | G |
| wt37-6-49005666 | 49.005666 | 1     | Exon 10 | Coding         | Synonymous  | Biotype: Protein Coding, I -> I, atC -> atT, 508 | C | T |
| wt37-6-49005885 | 49.005885 | 1     | Intron  | Nonsplice Site |             |                                                  | A | G |
| wt37-6-49006217 | 49.006217 | 1     | Intron  | Nonsplice Site |             |                                                  | G | A |
| wt37-6-49006238 | 49.006238 | 1     | Intron  | Nonsplice Site |             |                                                  | T | C |
| wt37-6-49006774 | 49.006774 | 0.845 | Intron  | Nonsplice Site |             |                                                  | C | T |
| wt37-6-49006860 | 49.00686  | 0.845 | Intron  | Nonsplice Site |             |                                                  | T | C |
| wt37-6-49007039 | 49.007039 | 0.845 | Intron  | Nonsplice Site |             |                                                  | G | T |
| rs38586314      | 49.007541 |       | Intron  | Nonsplice Site |             |                                                  | A | T |
| wt37-6-49007597 | 49.007597 | 0.845 | Intron  | Nonsplice Site |             |                                                  | A | C |
| wt37-6-49007893 | 49.007893 | 0.998 | Intron  | Nonsplice Site |             |                                                  | A | G |
| wt37-6-49007904 | 49.007904 | 0.998 | Intron  | Nonsplice Site |             |                                                  | A | G |
