# Supplementary material for: Genetic modulation of the iris transillumination defect: a systems genetics analysis using the expanded family of BXD glaucoma strains
Source: PubMed Central journal article supplement (PMC3752936; doi:10.1111/pcmr.12106), 2013-04-13
Supplement: pcmr0026-0487-SD4.pdf [file pcmr0026-0487-SD4.pdf]

**Appendix 4:** List of SNPs within *Oca2*

| SNP ID          | Mb        | ConScore | Domain 1 | Domain 2       | Function | Details                                        | B6 | D2 |
|-----------------|-----------|----------|----------|----------------|----------|------------------------------------------------|----|----|
| wt37-7-63495170 | 63.49517  | 0.659    | Exon 1   |                | Unknown  | Biotype: Protein Coding, Coding Region Unknown | G  | A  |
| wt37-7-63495200 | 63.4952   | 0.659    | Exon 1   |                | Unknown  | Biotype: Protein Coding, Coding Region Unknown | T  | G  |
| wt37-7-63495220 | 63.49522  | 0.659    | Exon 1   |                | Unknown  | Biotype: Protein Coding, Coding Region Unknown | T  | C  |
| wt37-7-63495447 | 63.495447 | 0.659    | Intron   | Nonsplice Site |          |                                                | G  | A  |
| wt37-7-63495466 | 63.495466 | 0.659    | Intron   | Nonsplice Site |          |                                                | A  | C  |
| wt37-7-63495937 | 63.495937 | 0.95     | Intron   | Nonsplice Site |          |                                                | C  | T  |
| wt37-7-63495990 | 63.49599  | 0.95     | Intron   | Nonsplice Site |          |                                                | C  | G  |
| wt37-7-63496003 | 63.496003 | 0.95     | Intron   | Nonsplice Site |          |                                                | T  | C  |
| wt37-7-63496217 | 63.496217 | 0.95     | Intron   | Nonsplice Site |          |                                                | T  | C  |
| wt37-7-63497502 | 63.497502 | 0.143    | Intron   | Nonsplice Site |          |                                                | T  | C  |
| wt37-7-63497590 | 63.49759  | 0.773    | Intron   | Nonsplice Site |          |                                                | C  | T  |
| wt37-7-63497760 | 63.49776  | 0.773    | Intron   | Nonsplice Site |          |                                                | G  | A  |
| wt37-7-63497835 | 63.497835 | 0.773    | Intron   | Nonsplice Site |          |                                                | A  | G  |
| wt37-7-63497910 | 63.49791  | 0.773    | Intron   | Nonsplice Site |          |                                                | T  | C  |
| wt37-7-63497924 | 63.497924 | 0.773    | Intron   | Nonsplice Site |          |                                                | T  | G  |
| wt37-7-63497925 | 63.497925 | 0.773    | Intron   | Nonsplice Site |          |                                                | C  | A  |
| wt37-7-63497948 | 63.497948 | 0.773    | Intron   | Nonsplice Site |          |                                                | G  | A  |
| wt37-7-63498136 | 63.498136 | 0.773    | Intron   | Nonsplice Site |          |                                                | T  | C  |
| wt37-7-63498202 | 63.498202 | 0.773    | Intron   | Nonsplice Site |          |                                                | T  | C  |
| wt37-7-63498290 | 63.49829  | 0.773    | Intron   | Nonsplice Site |          |                                                | T  | C  |
| wt37-7-63498292 | 63.498292 | 0.773    | Intron   | Nonsplice Site |          |                                                | C  | A  |
| wt37-7-63498386 | 63.498386 | 0.773    | Intron   | Nonsplice Site |          |                                                | T  | A  |
| wt37-7-63498444 | 63.498444 | 0.773    | Intron   | Nonsplice Site |          |                                                | T  | C  |
| wt37-7-63498471 | 63.498471 | 0.773    | Intron   | Nonsplice Site |          |                                                | T  | C  |
| wt37-7-63498498 | 63.498498 | 0.773    | Intron   | Nonsplice Site |          |                                                | T  | C  |
| wt37-7-63499260 | 63.49926  |          | Intron   | Nonsplice Site |          |                                                | A  | G  |

|                 |           |       |        |                |  |  |   |   |
|-----------------|-----------|-------|--------|----------------|--|--|---|---|
| wt37-7-63500125 | 63.500125 |       | Intron | Nonsplice Site |  |  | A | G |
| wt37-7-63500468 | 63.500468 | 0.45  | Intron | Nonsplice Site |  |  | T | C |
| wt37-7-63500488 | 63.500488 | 0.45  | Intron | Nonsplice Site |  |  | G | T |
| wt37-7-63500600 | 63.5006   | 0.45  | Intron | Nonsplice Site |  |  | G | C |
| wt37-7-63500607 | 63.500607 | 0.45  | Intron | Nonsplice Site |  |  | T | A |
| MRS2085401      | 63.501238 | 0.45  | Intron | Nonsplice Site |  |  | G | A |
| wt37-7-63501366 | 63.501366 | 1     | Intron | Nonsplice Site |  |  | C | A |
| wt37-7-63501399 | 63.501399 | 1     | Intron | Nonsplice Site |  |  | C | A |
| wt37-7-63502939 | 63.502939 | 0.998 | Intron | Nonsplice Site |  |  | T | A |
| wt37-7-63504708 | 63.504708 |       | Intron | Nonsplice Site |  |  | A | C |
| wt37-7-63505448 | 63.505448 |       | Intron | Nonsplice Site |  |  | A | G |
| wt37-7-63505833 | 63.505833 |       | Intron | Nonsplice Site |  |  | C | T |
| wt37-7-63506160 | 63.50616  | 0.434 | Intron | Nonsplice Site |  |  | T | C |
| wt37-7-63506190 | 63.50619  | 0.434 | Intron | Nonsplice Site |  |  | T | A |
| wt37-7-63506237 | 63.506237 | 0.434 | Intron | Nonsplice Site |  |  | A | G |
| wt37-7-63506315 | 63.506315 | 0.434 | Intron | Nonsplice Site |  |  | T | G |
| wt37-7-63506623 | 63.506623 | 0.434 | Intron | Nonsplice Site |  |  | G | A |
| wt37-7-63507150 | 63.50715  | 0.612 | Intron | Nonsplice Site |  |  | A | T |
| wt37-7-63507415 | 63.507415 |       | Intron | Nonsplice Site |  |  | T | A |
| wt37-7-63508528 | 63.508528 |       | Intron | Nonsplice Site |  |  | T | C |
| wt37-7-63513844 | 63.513844 | 1     | Intron | Nonsplice Site |  |  | C | A |
| wt37-7-63514387 | 63.514387 |       | Intron | Nonsplice Site |  |  | G | C |
| wt37-7-63514410 | 63.51441  |       | Intron | Nonsplice Site |  |  | C | T |
| wt37-7-63514415 | 63.514415 |       | Intron | Nonsplice Site |  |  | C | G |
| wt37-7-63514419 | 63.514419 |       | Intron | Nonsplice Site |  |  | C | G |
| wt37-7-63514423 | 63.514423 |       | Intron | Nonsplice Site |  |  | C | G |
| wt37-7-63514645 | 63.514645 |       | Intron | Nonsplice Site |  |  | G | A |

|                 |           |       |        |                |  |   |   |
|-----------------|-----------|-------|--------|----------------|--|---|---|
| wt37-7-63514783 | 63.514783 |       | Intron | Nonsplice Site |  | C | T |
| wt37-7-63514849 | 63.514849 |       | Intron | Nonsplice Site |  | A | C |
| wt37-7-63514937 | 63.514937 |       | Intron | Nonsplice Site |  | T | A |
| rs32201766      | 63.515568 |       | Intron | Nonsplice Site |  | T | C |
| wt37-7-63515603 | 63.515603 | 0.857 | Intron | Nonsplice Site |  | T | C |
| wt37-7-63515704 | 63.515704 | 0.857 | Intron | Nonsplice Site |  | T | C |
| wt37-7-63515761 | 63.515761 | 0.857 | Intron | Nonsplice Site |  | A | T |
| wt37-7-63515774 | 63.515774 | 0.857 | Intron | Nonsplice Site |  | T | C |
| wt37-7-63515778 | 63.515778 | 0.857 | Intron | Nonsplice Site |  | T | C |
| wt37-7-63515965 | 63.515965 | 0.857 | Intron | Nonsplice Site |  | G | T |
| wt37-7-63515982 | 63.515982 | 0.857 | Intron | Nonsplice Site |  | G | T |
| wt37-7-63516041 | 63.516041 | 0.857 | Intron | Nonsplice Site |  | G | C |
| wt37-7-63516044 | 63.516044 | 0.857 | Intron | Nonsplice Site |  | T | C |
| wt37-7-63516073 | 63.516073 | 0.857 | Intron | Nonsplice Site |  | T | G |
| wt37-7-63516105 | 63.516105 | 0.857 | Intron | Nonsplice Site |  | A | G |
| wt37-7-63516144 | 63.516144 | 0.857 | Intron | Nonsplice Site |  | C | A |
| wt37-7-63516166 | 63.516166 | 0.857 | Intron | Nonsplice Site |  | G | A |
| wt37-7-63516248 | 63.516248 | 0.857 | Intron | Nonsplice Site |  | C | T |
| wt37-7-63516690 | 63.51669  | 0.736 | Intron | Nonsplice Site |  | A | C |
| wt37-7-63516768 | 63.516768 | 0.736 | Intron | Nonsplice Site |  | G | A |
| wt37-7-63517199 | 63.517199 | 0.736 | Intron | Nonsplice Site |  | G | T |
| wt37-7-63517430 | 63.51743  | 0.736 | Intron | Nonsplice Site |  | T | C |
| wt37-7-63517445 | 63.517445 | 0.736 | Intron | Nonsplice Site |  | T | C |
| wt37-7-63517446 | 63.517446 | 0.736 | Intron | Nonsplice Site |  | T | C |
| wt37-7-63517484 | 63.517484 | 0.736 | Intron | Nonsplice Site |  | C | T |
| wt37-7-63517598 | 63.517598 | 0.036 | Intron | Nonsplice Site |  | A | G |
| wt37-7-63517679 | 63.517679 | 0.011 | Intron | Nonsplice Site |  | A | G |

|                 |           |       |        |                |  |   |   |
|-----------------|-----------|-------|--------|----------------|--|---|---|
| wt37-7-63517779 | 63.517779 | 0.269 | Intron | Nonsplice Site |  | T | A |
| rs32977478      | 63.518016 |       | Intron | Nonsplice Site |  | A | G |
| wt37-7-63518089 | 63.518089 | 0.269 | Intron | Nonsplice Site |  | G | A |
| wt37-7-63518254 | 63.518254 | 0.269 | Intron | Nonsplice Site |  | C | A |
| wt37-7-63518384 | 63.518384 | 0.269 | Intron | Nonsplice Site |  | G | A |
| wt37-7-63518403 | 63.518403 | 0.269 | Intron | Nonsplice Site |  | G | C |
| wt37-7-63518417 | 63.518417 | 0.269 | Intron | Nonsplice Site |  | T | C |
| wt37-7-63518436 | 63.518436 | 0.269 | Intron | Nonsplice Site |  | C | T |
| wt37-7-63518792 | 63.518792 |       | Intron | Nonsplice Site |  | C | G |
| wt37-7-63518850 | 63.51885  |       | Intron | Nonsplice Site |  | A | G |
| wt37-7-63518903 | 63.518903 | 0.788 | Intron | Nonsplice Site |  | G | A |
| wt37-7-63518908 | 63.518908 | 0.788 | Intron | Nonsplice Site |  | G | A |
| wt37-7-63518909 | 63.518909 | 0.788 | Intron | Nonsplice Site |  | A | C |
| wt37-7-63518937 | 63.518937 | 0.788 | Intron | Nonsplice Site |  | C | T |
| wt37-7-63519107 | 63.519107 | 0.788 | Intron | Nonsplice Site |  | C | T |
| wt37-7-63519300 | 63.5193   | 0.788 | Intron | Nonsplice Site |  | G | A |
| wt37-7-63519318 | 63.519318 | 0.788 | Intron | Nonsplice Site |  | T | C |
| wt37-7-63519333 | 63.519333 | 0.788 | Intron | Nonsplice Site |  | T | C |
| wt37-7-63519452 | 63.519452 | 0.788 | Intron | Nonsplice Site |  | C | A |
| wt37-7-63519628 | 63.519628 | 0.788 | Intron | Nonsplice Site |  | A | G |
| wt37-7-63519651 | 63.519651 | 0.788 | Intron | Nonsplice Site |  | A | C |
| wt37-7-63519803 | 63.519803 |       | Intron | Nonsplice Site |  | C | T |
| wt37-7-63519992 | 63.519992 | 0.425 | Intron | Nonsplice Site |  | C | T |
| wt37-7-63520195 | 63.520195 |       | Intron | Nonsplice Site |  | C | T |
| wt37-7-63520412 | 63.520412 |       | Intron | Nonsplice Site |  | G | A |
| wt37-7-63520531 | 63.520531 |       | Intron | Nonsplice Site |  | A | T |
| wt37-7-63520532 | 63.520532 |       | Intron | Nonsplice Site |  | A | T |

|                 |           |  |        |                |  |  |   |   |
|-----------------|-----------|--|--------|----------------|--|--|---|---|
| wt37-7-63520617 | 63.520617 |  | Intron | Nonsplice Site |  |  | T | C |
| MRS2085463      | 63.520707 |  | Intron | Nonsplice Site |  |  | T | C |
| MRS2085464      | 63.520763 |  | Intron | Nonsplice Site |  |  | G | A |
| wt37-7-63520770 | 63.52077  |  | Intron | Nonsplice Site |  |  | T | C |
| MRS2085466      | 63.520917 |  | Intron | Nonsplice Site |  |  | A | C |
| MRS2085467      | 63.520931 |  | Intron | Nonsplice Site |  |  | G | C |
| MRS2085468      | 63.521166 |  | Intron | Nonsplice Site |  |  | A | G |
| MRS2085469      | 63.52128  |  | Intron | Nonsplice Site |  |  | C | G |
| MRS2085470      | 63.521333 |  | Intron | Nonsplice Site |  |  | A | G |
| MRS2085471      | 63.521423 |  | Intron | Nonsplice Site |  |  | C | A |
| MRS2085472      | 63.521432 |  | Intron | Nonsplice Site |  |  | G | A |
| MRS2085473      | 63.521491 |  | Intron | Nonsplice Site |  |  | A | C |
| MRS2085474      | 63.52179  |  | Intron | Nonsplice Site |  |  | A | C |
| MRS2085475      | 63.52192  |  | Intron | Nonsplice Site |  |  | T | G |
| MRS2085476      | 63.521934 |  | Intron | Nonsplice Site |  |  | A | G |
| MRS2085477      | 63.52199  |  | Intron | Nonsplice Site |  |  | T | C |
| MRS2085478      | 63.522005 |  | Intron | Nonsplice Site |  |  | A | T |
| MRS2085479      | 63.522134 |  | Intron | Nonsplice Site |  |  | G | C |
| MRS2085480      | 63.522529 |  | Intron | Nonsplice Site |  |  | G | T |
| MRS2085481      | 63.522597 |  | Intron | Nonsplice Site |  |  | G | T |
| MRS2085482      | 63.522639 |  | Intron | Nonsplice Site |  |  | T | C |
| MRS2085483      | 63.522698 |  | Intron | Nonsplice Site |  |  | T | C |
| wt37-7-63522780 | 63.52278  |  | Intron | Nonsplice Site |  |  | G | T |
| MRS2085486      | 63.523028 |  | Intron | Nonsplice Site |  |  | C | T |
| MRS2085487      | 63.523252 |  | Intron | Nonsplice Site |  |  | T | C |
| MRS2085488      | 63.523319 |  | Intron | Nonsplice Site |  |  | C | T |
| MRS2085489      | 63.523332 |  | Intron | Nonsplice Site |  |  | T | C |

|                 |           |       |        |                |  |   |   |
|-----------------|-----------|-------|--------|----------------|--|---|---|
| MRS2085490      | 63.523356 |       | Intron | Nonsplice Site |  | G | T |
| wt37-7-63523627 | 63.523627 |       | Intron | Nonsplice Site |  | C | T |
| MRS2085491      | 63.523727 |       | Intron | Nonsplice Site |  | C | T |
| MRS2085492      | 63.52383  |       | Intron | Nonsplice Site |  | G | A |
| MRS2085493      | 63.523835 |       | Intron | Nonsplice Site |  | A | T |
| MRS2085494      | 63.523968 |       | Intron | Nonsplice Site |  | G | T |
| MRS2085495      | 63.524043 |       | Intron | Nonsplice Site |  | A | G |
| MRS2085496      | 63.524112 |       | Intron | Nonsplice Site |  | C | T |
| MRS2085497      | 63.524238 |       | Intron | Nonsplice Site |  | C | T |
| MRS2085498      | 63.52427  |       | Intron | Nonsplice Site |  | G | C |
| MRS2085499      | 63.524432 |       | Intron | Nonsplice Site |  | C | G |
| MRS2085500      | 63.524451 |       | Intron | Nonsplice Site |  | G | A |
| MRS2085501      | 63.524776 |       | Intron | Nonsplice Site |  | G | C |
| MRS2085502      | 63.524806 |       | Intron | Nonsplice Site |  | C | G |
| MRS2085503      | 63.525003 |       | Intron | Nonsplice Site |  | T | A |
| MRS2085504      | 63.525072 |       | Intron | Nonsplice Site |  | T | C |
| MRS2085505      | 63.525368 |       | Intron | Nonsplice Site |  | C | T |
| MRS2085506      | 63.525502 |       | Intron | Nonsplice Site |  | C | A |
| MRS2085507      | 63.525551 |       | Intron | Nonsplice Site |  | A | G |
| MRS2085508      | 63.525694 |       | Intron | Nonsplice Site |  | C | T |
| MRS2085509      | 63.527178 |       | Intron | Nonsplice Site |  | A | G |
| wt37-7-63531344 | 63.531344 | 0.409 | Intron | Nonsplice Site |  | G | A |
| wt37-7-63531345 | 63.531345 | 0.409 | Intron | Nonsplice Site |  | A | T |
| wt37-7-63531777 | 63.531777 | 0.494 | Intron | Nonsplice Site |  | C | T |
| MRS2085511      | 63.532144 | 0.494 | Intron | Nonsplice Site |  | T | G |
| wt37-7-63534559 | 63.534559 |       | Intron | Nonsplice Site |  | G | C |
| wt37-7-63534896 | 63.534896 | 0.678 | Intron | Nonsplice Site |  | A | G |

|                 |           |       |        |                |  |  |   |   |
|-----------------|-----------|-------|--------|----------------|--|--|---|---|
| MRS2085514      | 63.534897 | 0.678 | Intron | Nonsplice Site |  |  | C | T |
| wt37-7-63534898 | 63.534898 | 0.678 | Intron | Nonsplice Site |  |  | T | C |
| wt37-7-63534930 | 63.53493  | 0.678 | Intron | Nonsplice Site |  |  | A | C |
| wt37-7-63535918 | 63.535918 | 0.919 | Intron | Nonsplice Site |  |  | C | T |
| wt37-7-63536229 | 63.536229 | 0.919 | Exon   | 3' UTR         |  |  | T | A |
| wt37-7-63536469 | 63.536469 | 0.919 | Intron | Nonsplice Site |  |  | A | T |
| wt37-7-63536500 | 63.5365   | 0.919 | Intron | Nonsplice Site |  |  | T | A |
| wt37-7-63536541 | 63.536541 | 0.919 | Intron | Nonsplice Site |  |  | C | T |
| wt37-7-63536564 | 63.536564 | 0.919 | Intron | Nonsplice Site |  |  | C | T |
| wt37-7-63536569 | 63.536569 | 0.919 | Intron | Nonsplice Site |  |  | G | A |
| MRS2085523      | 63.537655 | 0.851 | Intron | Nonsplice Site |  |  | G | A |
| wt37-7-63537656 | 63.537656 | 0.851 | Intron | Nonsplice Site |  |  | G | A |
| wt37-7-63538039 | 63.538039 | 0.965 | Intron | Nonsplice Site |  |  | G | A |
| wt37-7-63538052 | 63.538052 | 0.965 | Intron | Nonsplice Site |  |  | G | A |
| wt37-7-63538288 | 63.538288 | 0.965 | Intron | Nonsplice Site |  |  | T | C |
| wt37-7-63538291 | 63.538291 | 0.965 | Intron | Nonsplice Site |  |  | A | G |
| wt37-7-63539044 | 63.539044 | 0.929 | Intron | Nonsplice Site |  |  | T | C |
| wt37-7-63539230 | 63.53923  | 0.929 | Intron | Nonsplice Site |  |  | T | G |
| wt37-7-63540973 | 63.540973 | 0.515 | Intron | Nonsplice Site |  |  | A | G |
| wt37-7-63541455 | 63.541455 | 0.515 | Intron | Nonsplice Site |  |  | C | T |
| wt37-7-63541781 | 63.541781 |       | Intron | Nonsplice Site |  |  | T | A |
| wt37-7-63542650 | 63.54265  | 0.503 | Intron | Nonsplice Site |  |  | C | T |
| wt37-7-63542739 | 63.542739 | 0.503 | Intron | Nonsplice Site |  |  | T | C |
| wt37-7-63542824 | 63.542824 | 0.503 | Intron | Nonsplice Site |  |  | C | A |
| wt37-7-63542919 | 63.542919 | 0.503 | Intron | Nonsplice Site |  |  | A | G |
| wt37-7-63542991 | 63.542991 | 0.503 | Intron | Nonsplice Site |  |  | C | T |
| wt37-7-63543105 | 63.543105 | 0.503 | Intron | Nonsplice Site |  |  | A | T |

|                 |           |       |        |                |  |   |   |
|-----------------|-----------|-------|--------|----------------|--|---|---|
| wt37-7-63543240 | 63.54324  |       | Intron | Nonsplice Site |  | C | T |
| wt37-7-63543321 | 63.543321 |       | Intron | Nonsplice Site |  | T | C |
| wt37-7-63543556 | 63.543556 | 0.781 | Intron | Nonsplice Site |  | A | G |
| wt37-7-63543658 | 63.543658 | 0.781 | Intron | Nonsplice Site |  | A | G |
| wt37-7-63543695 | 63.543695 | 0.781 | Intron | Nonsplice Site |  | A | T |
| wt37-7-63543914 | 63.543914 | 0.781 | Intron | Nonsplice Site |  | A | G |
| wt37-7-63543992 | 63.543992 | 0.781 | Intron | Nonsplice Site |  | A | G |
| wt37-7-63543996 | 63.543996 | 0.781 | Intron | Nonsplice Site |  | A | G |
| wt37-7-63544000 | 63.544    | 0.781 | Intron | Nonsplice Site |  | A | G |
| wt37-7-63544004 | 63.544004 | 0.781 | Intron | Nonsplice Site |  | A | G |
| wt37-7-63544008 | 63.544008 | 0.781 | Intron | Nonsplice Site |  | A | G |
| wt37-7-63544012 | 63.544012 | 0.781 | Intron | Nonsplice Site |  | A | G |
| wt37-7-63544016 | 63.544016 | 0.781 | Intron | Nonsplice Site |  | A | G |
| wt37-7-63544080 | 63.54408  | 0.781 | Intron | Nonsplice Site |  | T | C |
| wt37-7-63544129 | 63.544129 | 0.781 | Intron | Nonsplice Site |  | A | C |
| wt37-7-63544472 | 63.544472 | 0.781 | Intron | Nonsplice Site |  | G | T |
| wt37-7-63544703 | 63.544703 | 0.998 | Intron | Nonsplice Site |  | C | G |
| wt37-7-63545034 | 63.545034 | 0.998 | Intron | Nonsplice Site |  | T | C |
| wt37-7-63545199 | 63.545199 | 0.998 | Intron | Nonsplice Site |  | T | C |
| wt37-7-63545606 | 63.545606 | 0.382 | Intron | Nonsplice Site |  | C | T |
| wt37-7-63545798 | 63.545798 | 0.382 | Intron | Nonsplice Site |  | C | T |
| wt37-7-63546391 | 63.546391 | 0.382 | Intron | Nonsplice Site |  | G | C |
| wt37-7-63546549 | 63.546549 | 0.867 | Intron | Nonsplice Site |  | T | C |
| wt37-7-63546899 | 63.546899 | 0.867 | Intron | Nonsplice Site |  | G | A |
| wt37-7-63546912 | 63.546912 | 0.867 | Intron | Nonsplice Site |  | G | T |
| MRS2085559      | 63.547367 | 0.867 | Intron | Nonsplice Site |  | G | A |
| wt37-7-63547648 | 63.547648 | 0.895 | Intron | Nonsplice Site |  | C | T |



|                 |           |       |        |                |  |   |   |
|-----------------|-----------|-------|--------|----------------|--|---|---|
| wt37-7-63547864 | 63.547864 | 0.895 | Intron | Nonsplice Site |  | A | G |
| wt37-7-63547897 | 63.547897 | 0.895 | Intron | Nonsplice Site |  | T | A |
| wt37-7-63547908 | 63.547908 |       | Intron | Nonsplice Site |  | T | G |
| wt37-7-63547910 | 63.54791  |       | Intron | Nonsplice Site |  | T | G |
| wt37-7-63548388 | 63.548388 | 0.579 | Intron | Nonsplice Site |  | G | T |
| wt37-7-63548400 | 63.5484   | 0.579 | Intron | Nonsplice Site |  | C | G |
| wt37-7-63548409 | 63.548409 | 0.579 | Intron | Nonsplice Site |  | T | C |
| wt37-7-63548431 | 63.548431 | 0.579 | Intron | Nonsplice Site |  | C | T |
| wt37-7-63548495 | 63.548495 | 0.579 | Intron | Nonsplice Site |  | A | G |
| wt37-7-63548540 | 63.54854  |       | Intron | Nonsplice Site |  | A | G |
| wt37-7-63548548 | 63.548548 | 1     | Intron | Nonsplice Site |  | T | C |
| wt37-7-63548578 | 63.548578 | 1     | Intron | Nonsplice Site |  | C | T |
| wt37-7-63548582 | 63.548582 | 1     | Intron | Nonsplice Site |  | T | C |
| wt37-7-63548593 | 63.548593 | 1     | Intron | Nonsplice Site |  | G | A |
| wt37-7-63548594 | 63.548594 | 1     | Intron | Nonsplice Site |  | T | C |
| wt37-7-63548629 | 63.548629 | 1     | Intron | Nonsplice Site |  | G | A |
| wt37-7-63548632 | 63.548632 | 1     | Intron | Nonsplice Site |  | C | T |
| wt37-7-63548641 | 63.548641 | 1     | Intron | Nonsplice Site |  | G | A |
| wt37-7-63548644 | 63.548644 | 1     | Intron | Nonsplice Site |  | C | G |
| wt37-7-63548681 | 63.548681 | 1     | Intron | Nonsplice Site |  | C | T |
| wt37-7-63548695 | 63.548695 | 1     | Intron | Nonsplice Site |  | G | A |
| wt37-7-63548696 | 63.548696 | 1     | Intron | Nonsplice Site |  | A | G |
| wt37-7-63548725 | 63.548725 | 1     | Intron | Nonsplice Site |  | T | A |
| wt37-7-63548731 | 63.548731 | 1     | Intron | Nonsplice Site |  | T | C |
| wt37-7-63548760 | 63.54876  | 1     | Intron | Nonsplice Site |  | T | C |
| wt37-7-63548761 | 63.548761 | 1     | Intron | Nonsplice Site |  | G | T |
| wt37-7-63548781 | 63.548781 | 1     | Intron | Nonsplice Site |  | T | C |

|                 |           |       |        |                |  |   |   |
|-----------------|-----------|-------|--------|----------------|--|---|---|
| wt37-7-63548782 | 63.548782 | 1     | Intron | Nonsplice Site |  | G | A |
| wt37-7-63548860 | 63.54886  | 1     | Intron | Nonsplice Site |  | G | T |
| wt37-7-63548924 | 63.548924 | 1     | Intron | Nonsplice Site |  | G | A |
| wt37-7-63549155 | 63.549155 | 1     | Exon   | 3' UTR         |  | A | T |
| wt37-7-63549529 | 63.549529 | 1     | Intron | Nonsplice Site |  | C | T |
| wt37-7-63549578 | 63.549578 | 0.522 | Intron | Nonsplice Site |  | A | G |
| wt37-7-63549589 | 63.549589 | 0.522 | Intron | Nonsplice Site |  | T | G |
| wt37-7-63549684 | 63.549684 | 0.522 | Intron | Nonsplice Site |  | C | A |
| wt37-7-63550944 | 63.550944 | 1     | Intron | Nonsplice Site |  | C | T |
| wt37-7-63551565 | 63.551565 | 1     | Intron | Nonsplice Site |  | T | G |
| wt37-7-63552076 | 63.552076 | 1     | Intron | Nonsplice Site |  | C | T |
| wt37-7-63552720 | 63.55272  | 0.47  | Intron | Nonsplice Site |  | C | G |
| MRS2085587      | 63.553755 | 0.393 | Intron | Nonsplice Site |  | A | T |
| wt37-7-63554184 | 63.554184 | 0.716 | Intron | Nonsplice Site |  | C | T |
| wt37-7-63554697 | 63.554697 | 0.716 | Intron | Nonsplice Site |  | G | A |
| wt37-7-63554908 | 63.554908 | 0.716 | Intron | Nonsplice Site |  | A | G |
| MRS2085591      | 63.555474 | 0.311 | Intron | Nonsplice Site |  | C | A |
| wt37-7-63555879 | 63.555879 | 0.311 | Intron | Nonsplice Site |  | G | T |
| wt37-7-63555891 | 63.555891 | 0.311 | Intron | Nonsplice Site |  | T | C |
| wt37-7-63555918 | 63.555918 | 0.311 | Intron | Nonsplice Site |  | A | G |
| wt37-7-63556460 | 63.55646  | 0.803 | Intron | Nonsplice Site |  | T | C |
| wt37-7-63556570 | 63.55657  | 0.803 | Intron | Nonsplice Site |  | G | A |
| wt37-7-63557205 | 63.557205 | 0.524 | Intron | Nonsplice Site |  | C | T |
| wt37-7-63557664 | 63.557664 | 0.524 | Intron | Nonsplice Site |  | C | A |
| wt37-7-63557828 | 63.557828 | 0.524 | Intron | Nonsplice Site |  | A | G |
| wt37-7-63558641 | 63.558641 | 0.779 | Intron | Nonsplice Site |  | A | G |
| wt37-7-63558891 | 63.558891 | 0.779 | Intron | Nonsplice Site |  | G | A |

|                 |           |       |        |                |  |  |   |   |
|-----------------|-----------|-------|--------|----------------|--|--|---|---|
| wt37-7-63558979 | 63.558979 | 0.779 | Intron | Nonsplice Site |  |  | C | T |
| wt37-7-63559272 | 63.559272 | 0.737 | Intron | Nonsplice Site |  |  | A | G |
| wt37-7-63559582 | 63.559582 | 0.737 | Intron | Nonsplice Site |  |  | T | C |
| wt37-7-63560110 | 63.56011  | 0.737 | Intron | Nonsplice Site |  |  | G | A |
| wt37-7-63560887 | 63.560887 |       | Intron | Nonsplice Site |  |  | G | A |
| wt37-7-63561396 | 63.561396 | 0.717 | Intron | Nonsplice Site |  |  | G | C |
| wt37-7-63561741 | 63.561741 | 0.717 | Intron | Nonsplice Site |  |  | T | A |
| wt37-7-63561865 | 63.561865 | 0.717 | Intron | Nonsplice Site |  |  | G | A |
| wt37-7-63562227 | 63.562227 | 0.717 | Intron | Nonsplice Site |  |  | C | T |
| wt37-7-63562339 | 63.562339 | 0.72  | Intron | Nonsplice Site |  |  | G | C |
| wt37-7-63563258 | 63.563258 | 0.72  | Intron | Nonsplice Site |  |  | G | A |
| wt37-7-63563320 | 63.56332  | 0.72  | Intron | Nonsplice Site |  |  | T | C |
| wt37-7-63563337 | 63.563337 | 0.72  | Intron | Nonsplice Site |  |  | T | C |
| wt37-7-63564113 | 63.564113 | 0.726 | Intron | Nonsplice Site |  |  | G | A |
| wt37-7-63564264 | 63.564264 | 0.726 | Intron | Nonsplice Site |  |  | C | A |
| wt37-7-63564276 | 63.564276 | 0.726 | Intron | Nonsplice Site |  |  | C | A |
| wt37-7-63564278 | 63.564278 | 0.726 | Intron | Nonsplice Site |  |  | C | A |
| wt37-7-63565045 | 63.565045 |       | Intron | Nonsplice Site |  |  | C | T |
| wt37-7-63566270 | 63.56627  | 0.861 | Intron | Nonsplice Site |  |  | T | A |
| wt37-7-63566286 | 63.566286 | 0.861 | Intron | Nonsplice Site |  |  | C | A |
| wt37-7-63567015 | 63.567015 | 0.861 | Intron | Nonsplice Site |  |  | A | G |
| wt37-7-63567661 | 63.567661 | 0.441 | Intron | Nonsplice Site |  |  | G | C |
| wt37-7-63567864 | 63.567864 | 0.441 | Intron | Nonsplice Site |  |  | G | A |
| wt37-7-63567913 | 63.567913 | 0.441 | Intron | Nonsplice Site |  |  | T | C |
| wt37-7-63568079 | 63.568079 | 0.441 | Intron | Nonsplice Site |  |  | G | C |
| wt37-7-63568084 | 63.568084 | 0.441 | Intron | Nonsplice Site |  |  | C | T |
| wt37-7-63568427 | 63.568427 | 0.441 | Intron | Nonsplice Site |  |  | G | C |

|                 |           |       |        |                |  |   |   |
|-----------------|-----------|-------|--------|----------------|--|---|---|
| wt37-7-63568647 | 63.568647 |       | Intron | Nonsplice Site |  | C | G |
| wt37-7-63569085 | 63.569085 |       | Intron | Nonsplice Site |  | G | T |
| wt37-7-63569317 | 63.569317 | 1     | Intron | Nonsplice Site |  | T | C |
| wt37-7-63569657 | 63.569657 | 1     | Intron | Nonsplice Site |  | C | T |
| wt37-7-63571035 | 63.571035 |       | Intron | Nonsplice Site |  | A | G |
| wt37-7-63571036 | 63.571036 |       | Intron | Nonsplice Site |  | G | A |
| wt37-7-63571084 | 63.571084 |       | Intron | Nonsplice Site |  | A | G |
| wt37-7-63571265 | 63.571265 | 1     | Intron | Nonsplice Site |  | G | A |
| wt37-7-63572321 | 63.572321 |       | Intron | Nonsplice Site |  | A | T |
| MRS2085637      | 63.573013 |       | Intron | Nonsplice Site |  | A | T |
| MRS2085638      | 63.573647 |       | Intron | Nonsplice Site |  | A | G |
| MRS2085639      | 63.573906 |       | Intron | Nonsplice Site |  | T | C |
| wt37-7-63574048 | 63.574048 |       | Intron | Nonsplice Site |  | A | G |
| wt37-7-63574823 | 63.574823 | 0.854 | Intron | Nonsplice Site |  | G | A |
| MRS2085642      | 63.575163 | 0.854 | Intron | Nonsplice Site |  | A | C |
| wt37-7-63575190 | 63.57519  | 0.854 | Intron | Nonsplice Site |  | A | C |
| wt37-7-63575198 | 63.575198 | 0.854 | Intron | Nonsplice Site |  | T | A |
| wt37-7-63575237 | 63.575237 | 0.854 | Intron | Nonsplice Site |  | G | A |
| wt37-7-63575599 | 63.575599 | 0.074 | Intron | Nonsplice Site |  | A | G |
| wt37-7-63575614 | 63.575614 | 0.074 | Intron | Nonsplice Site |  | G | A |
| wt37-7-63575699 | 63.575699 | 0.074 | Intron | Nonsplice Site |  | C | G |
| wt37-7-63575970 | 63.57597  | 0.074 | Intron | Nonsplice Site |  | G | A |
| MRS2085650      | 63.576083 | 1     | Intron | Nonsplice Site |  | T | C |
| wt37-7-63576146 | 63.576146 | 1     | Intron | Nonsplice Site |  | T | A |
| wt37-7-63576219 | 63.576219 | 1     | Intron | Nonsplice Site |  | G | A |
| wt37-7-63576225 | 63.576225 | 1     | Intron | Nonsplice Site |  | A | G |
| wt37-7-63576261 | 63.576261 | 1     | Intron | Nonsplice Site |  | G | A |

|                 |           |       |        |                |  |   |   |
|-----------------|-----------|-------|--------|----------------|--|---|---|
| wt37-7-63576456 | 63.576456 | 1     | Intron | Nonsplice Site |  | G | T |
| wt37-7-63576530 | 63.57653  | 1     | Intron | Nonsplice Site |  | T | A |
| wt37-7-63576591 | 63.576591 | 1     | Intron | Nonsplice Site |  | G | A |
| wt37-7-63576630 | 63.57663  | 1     | Intron | Nonsplice Site |  | C | T |
| wt37-7-63576721 | 63.576721 | 1     | Intron | Nonsplice Site |  | A | T |
| wt37-7-63576734 | 63.576734 | 1     | Intron | Nonsplice Site |  | T | G |
| wt37-7-63576768 | 63.576768 | 1     | Intron | Nonsplice Site |  | C | T |
| wt37-7-63576808 | 63.576808 | 1     | Intron | Nonsplice Site |  | A | G |
| wt37-7-63576816 | 63.576816 | 1     | Intron | Nonsplice Site |  | G | A |
| wt37-7-63576833 | 63.576833 | 1     | Intron | Nonsplice Site |  | G | A |
| wt37-7-63576966 | 63.576966 | 1     | Intron | Nonsplice Site |  | G | T |
| wt37-7-63576979 | 63.576979 | 1     | Intron | Nonsplice Site |  | G | A |
| wt37-7-63577025 | 63.577025 | 1     | Intron | Nonsplice Site |  | A | G |
| wt37-7-63577026 | 63.577026 | 1     | Intron | Nonsplice Site |  | T | C |
| wt37-7-63577205 | 63.577205 | 0.881 | Intron | Nonsplice Site |  | C | T |
| wt37-7-63577258 | 63.577258 | 0.881 | Intron | Nonsplice Site |  | G | A |
| wt37-7-63577282 | 63.577282 | 0.881 | Intron | Nonsplice Site |  | A | G |
| wt37-7-63577294 | 63.577294 | 0.881 | Intron | Nonsplice Site |  | G | A |
| wt37-7-63577309 | 63.577309 | 0.881 | Intron | Nonsplice Site |  | G | A |
| wt37-7-63577377 | 63.577377 | 0.881 | Intron | Nonsplice Site |  | A | T |
| wt37-7-63577388 | 63.577388 | 0.881 | Intron | Nonsplice Site |  | A | G |
| wt37-7-63577416 | 63.577416 | 0.881 | Intron | Nonsplice Site |  | A | G |
| wt37-7-63577420 | 63.57742  | 0.881 | Intron | Nonsplice Site |  | G | A |
| wt37-7-63577496 | 63.577496 | 0.881 | Intron | Nonsplice Site |  | C | T |
| wt37-7-63577639 | 63.577639 | 0.881 | Intron | Nonsplice Site |  | A | T |
| wt37-7-63578292 | 63.578292 | 0.396 | Intron | Nonsplice Site |  | T | C |
| wt37-7-63578736 | 63.578736 | 1     | Intron | Nonsplice Site |  | C | T |

|                 |           |       |        |                |  |   |   |
|-----------------|-----------|-------|--------|----------------|--|---|---|
| wt37-7-63579479 | 63.579479 | 1     | Intron | Nonsplice Site |  | A | G |
| wt37-7-63579524 | 63.579524 | 1     | Intron | Nonsplice Site |  | T | A |
| wt37-7-63580033 | 63.580033 | 1     | Exon   | 3' UTR         |  | A | G |
| wt37-7-63580235 | 63.580235 | 1     | Intron | Nonsplice Site |  | A | C |
| wt37-7-63580847 | 63.580847 | 0.817 | Intron | Nonsplice Site |  | G | A |
| wt37-7-63581090 | 63.58109  | 0.817 | Intron | Nonsplice Site |  | A | T |
| wt37-7-63581094 | 63.581094 | 0.817 | Intron | Nonsplice Site |  | C | T |
| wt37-7-63581240 | 63.58124  | 0.817 | Intron | Nonsplice Site |  | C | T |
| wt37-7-63581253 | 63.581253 | 0.817 | Intron | Nonsplice Site |  | A | G |
| wt37-7-63581367 | 63.581367 | 0.817 | Intron | Nonsplice Site |  | T | G |
| wt37-7-63581450 | 63.58145  | 0.817 | Intron | Nonsplice Site |  | G | T |
| wt37-7-63581549 | 63.581549 | 0.817 | Intron | Nonsplice Site |  | C | T |
| wt37-7-63581553 | 63.581553 | 0.817 | Intron | Nonsplice Site |  | T | C |
| wt37-7-63581603 | 63.581603 | 0.817 | Intron | Nonsplice Site |  | A | G |
| wt37-7-63581660 | 63.58166  | 0.142 | Intron | Nonsplice Site |  | C | T |
| wt37-7-63581690 | 63.58169  | 0.142 | Intron | Nonsplice Site |  | T | A |
| wt37-7-63581842 | 63.581842 | 0.142 | Intron | Nonsplice Site |  | C | A |
| wt37-7-63581867 | 63.581867 | 0.142 | Intron | Nonsplice Site |  | G | C |
| wt37-7-63581878 | 63.581878 | 0.142 | Intron | Nonsplice Site |  | A | G |
| wt37-7-63581894 | 63.581894 | 0.142 | Intron | Nonsplice Site |  | C | T |
| wt37-7-63581908 | 63.581908 | 0.142 | Intron | Nonsplice Site |  | C | T |
| wt37-7-63581910 | 63.58191  | 0.142 | Intron | Nonsplice Site |  | A | G |
| wt37-7-63582087 | 63.582087 | 0.142 | Intron | Nonsplice Site |  | T | C |
| wt37-7-63582094 | 63.582094 | 0.142 | Intron | Nonsplice Site |  | G | A |
| wt37-7-63582157 | 63.582157 |       | Intron | Nonsplice Site |  | T | A |
| wt37-7-63582184 | 63.582184 |       | Intron | Nonsplice Site |  | A | G |
| wt37-7-63582197 | 63.582197 |       | Intron | Nonsplice Site |  | A | G |

|                 |           |       |        |                |  |   |   |
|-----------------|-----------|-------|--------|----------------|--|---|---|
| wt37-7-63582214 | 63.582214 |       | Intron | Nonsplice Site |  | A | G |
| wt37-7-63582240 | 63.58224  |       | Intron | Nonsplice Site |  | T | A |
| wt37-7-63582244 | 63.582244 |       | Intron | Nonsplice Site |  | G | A |
| wt37-7-63582254 | 63.582254 |       | Intron | Nonsplice Site |  | C | T |
| wt37-7-63582269 | 63.582269 |       | Intron | Nonsplice Site |  | C | T |
| wt37-7-63582393 | 63.582393 | 1     | Intron | Nonsplice Site |  | G | T |
| wt37-7-63582461 | 63.582461 | 1     | Intron | Nonsplice Site |  | A | T |
| wt37-7-63582544 | 63.582544 | 1     | Intron | Nonsplice Site |  | C | T |
| wt37-7-63582547 | 63.582547 | 1     | Intron | Nonsplice Site |  | T | C |
| wt37-7-63582593 | 63.582593 | 1     | Intron | Nonsplice Site |  | A | C |
| wt37-7-63582607 | 63.582607 | 1     | Intron | Nonsplice Site |  | T | C |
| wt37-7-63582635 | 63.582635 | 1     | Exon   | 3' UTR         |  | C | T |
| wt37-7-63582776 | 63.582776 | 1     | Intron | Nonsplice Site |  | T | C |
| wt37-7-63582863 | 63.582863 | 1     | Intron | Nonsplice Site |  | T | C |
| wt37-7-63583075 | 63.583075 | 1     | Intron | Nonsplice Site |  | G | T |
| wt37-7-63583956 | 63.583956 | 1     | Intron | Nonsplice Site |  | A | G |
| MRS2085723      | 63.585034 | 1     | Intron | Nonsplice Site |  | G | A |
| wt37-7-63585165 | 63.585165 | 1     | Intron | Nonsplice Site |  | A | C |
| wt37-7-63588026 | 63.588026 | 0.268 | Intron | Nonsplice Site |  | T | G |
| wt37-7-63588431 | 63.588431 |       | Intron | Nonsplice Site |  | A | G |
| wt37-7-63588466 | 63.588466 |       | Intron | Nonsplice Site |  | C | T |
| wt37-7-63588610 | 63.58861  |       | Intron | Nonsplice Site |  | G | A |
| wt37-7-63588680 | 63.58868  |       | Intron | Nonsplice Site |  | A | G |
| wt37-7-63588729 | 63.588729 |       | Intron | Nonsplice Site |  | T | A |
| wt37-7-63589740 | 63.58974  | 0.945 | Intron | Nonsplice Site |  | A | G |
| wt37-7-63590162 | 63.590162 |       | Intron | Nonsplice Site |  | T | C |
| wt37-7-63590299 | 63.590299 |       | Intron | Nonsplice Site |  | G | A |

|                 |           |       |        |                |  |  |  |   |   |
|-----------------|-----------|-------|--------|----------------|--|--|--|---|---|
| wt37-7-63591050 | 63.59105  | 0.594 | Intron | Nonsplice Site |  |  |  | T | C |
| wt37-7-63591491 | 63.591491 | 0.612 | Intron | Nonsplice Site |  |  |  | G | T |
| wt37-7-63591685 | 63.591685 |       | Intron | Nonsplice Site |  |  |  | C | T |
| wt37-7-63596929 | 63.596929 | 0.669 | Intron | Nonsplice Site |  |  |  | C | T |
| wt37-7-63597332 | 63.597332 | 0.125 | Intron | Nonsplice Site |  |  |  | A | G |
| MRS2085740      | 63.597333 | 0.125 | Intron | Nonsplice Site |  |  |  | T | A |
| wt37-7-63597349 | 63.597349 | 0.125 | Intron | Nonsplice Site |  |  |  | C | A |
| rs31250970      | 63.597421 |       | Intron | Nonsplice Site |  |  |  | A | C |
| wt37-7-63597426 | 63.597426 |       | Intron | Nonsplice Site |  |  |  | A | C |
| wt37-7-63597455 | 63.597455 |       | Intron | Nonsplice Site |  |  |  | G | C |
| MRS2085743      | 63.597973 |       | Intron | Nonsplice Site |  |  |  | A | G |
| MRS2085744      | 63.598532 |       | Intron | Nonsplice Site |  |  |  | G | C |
| MRS2085745      | 63.599819 |       | Intron | Nonsplice Site |  |  |  | A | G |
| MRS2085746      | 63.599835 |       | Intron | Nonsplice Site |  |  |  | G | T |
| MRS2085747      | 63.599878 |       | Intron | Nonsplice Site |  |  |  | C | A |
| MRS2085748      | 63.60017  |       | Intron | Nonsplice Site |  |  |  | T | C |
| MRS2085749      | 63.600617 |       | Intron | Nonsplice Site |  |  |  | G | A |
| MRS2085750      | 63.600623 |       | Intron | Nonsplice Site |  |  |  | C | G |
| MRS2085751      | 63.600749 |       | Intron | Nonsplice Site |  |  |  | C | T |
| MRS2085752      | 63.600764 |       | Intron | Nonsplice Site |  |  |  | A | G |
| wt37-7-63600807 | 63.600807 |       | Intron | Nonsplice Site |  |  |  | T | C |
| MRS2085754      | 63.600983 |       | Intron | Nonsplice Site |  |  |  | C | T |
| MRS2085755      | 63.601308 |       | Intron | Nonsplice Site |  |  |  | T | C |
| MRS2085756      | 63.601851 |       | Intron | Nonsplice Site |  |  |  | C | T |
| MRS2085757      | 63.602695 |       | Intron | Nonsplice Site |  |  |  | C | T |
| MRS2085758      | 63.602783 |       | Intron | Nonsplice Site |  |  |  | A | C |
| wt37-7-63603427 | 63.603427 |       | Intron | Nonsplice Site |  |  |  | C | T |



|                 |           |       |        |                |  |  |   |   |
|-----------------|-----------|-------|--------|----------------|--|--|---|---|
| wt37-7-63603823 | 63.603823 | 0.967 | Intron | Nonsplice Site |  |  | G | A |
| wt37-7-63603870 | 63.60387  | 0.967 | Intron | Nonsplice Site |  |  | T | C |
| wt37-7-63604121 | 63.604121 | 0.967 | Intron | Nonsplice Site |  |  | G | C |
| wt37-7-63604412 | 63.604412 | 0.967 | Intron | Nonsplice Site |  |  | C | G |
| wt37-7-63604707 | 63.604707 | 0.855 | Intron | Nonsplice Site |  |  | G | A |
| wt37-7-63605413 | 63.605413 | 0.855 | Intron | Nonsplice Site |  |  | C | T |
| wt37-7-63606239 | 63.606239 | 0.823 | Intron | Nonsplice Site |  |  | T | C |
| wt37-7-63606377 | 63.606377 | 0.823 | Intron | Nonsplice Site |  |  | G | C |
| wt37-7-63606725 | 63.606725 | 0.297 | Intron | Nonsplice Site |  |  | T | A |
| wt37-7-63606884 | 63.606884 | 0.297 | Intron | Nonsplice Site |  |  | T | C |
| wt37-7-63607291 | 63.607291 |       | Intron | Nonsplice Site |  |  | T | G |
| wt37-7-63608074 | 63.608074 |       | Intron | Nonsplice Site |  |  | A | T |
| wt37-7-63608353 | 63.608353 | 0.714 | Intron | Nonsplice Site |  |  | A | G |
| wt37-7-63608520 | 63.60852  | 0.714 | Intron | Nonsplice Site |  |  | A | G |
| wt37-7-63608559 | 63.608559 | 0.714 | Intron | Nonsplice Site |  |  | A | G |
| wt37-7-63608642 | 63.608642 | 0.714 | Intron | Nonsplice Site |  |  | A | C |
| wt37-7-63609254 | 63.609254 | 0.714 | Intron | Nonsplice Site |  |  | G | T |
| wt37-7-63609767 | 63.609767 | 0.902 | Intron | Nonsplice Site |  |  | T | C |
| wt37-7-63611138 | 63.611138 | 0.39  | Intron | Nonsplice Site |  |  | T | G |
| wt37-7-63611395 | 63.611395 | 0.39  | Intron | Nonsplice Site |  |  | T | C |
| wt37-7-63611974 | 63.611974 | 0.515 | Intron | Nonsplice Site |  |  | T | C |
| wt37-7-63612267 | 63.612267 | 0.515 | Intron | Nonsplice Site |  |  | C | T |
| wt37-7-63612461 | 63.612461 | 1     | Intron | Nonsplice Site |  |  | T | C |
| wt37-7-63613037 | 63.613037 | 1     | Intron | Nonsplice Site |  |  | C | T |
| wt37-7-63613379 | 63.613379 | 1     | Intron | Nonsplice Site |  |  | C | T |
| wt37-7-63613535 | 63.613535 | 0.453 | Intron | Nonsplice Site |  |  | T | C |
| wt37-7-63613565 | 63.613565 | 0.453 | Intron | Nonsplice Site |  |  | G | C |

|                 |           |       |        |                |  |  |   |   |
|-----------------|-----------|-------|--------|----------------|--|--|---|---|
| wt37-7-63613577 | 63.613577 | 0.453 | Intron | Nonsplice Site |  |  | G | C |
| wt37-7-63613579 | 63.613579 | 0.453 | Intron | Nonsplice Site |  |  | C | G |
| wt37-7-63614566 | 63.614566 |       | Intron | Nonsplice Site |  |  | G | A |
| wt37-7-63614606 | 63.614606 |       | Intron | Nonsplice Site |  |  | T | G |
| wt37-7-63617267 | 63.617267 |       | Intron | Nonsplice Site |  |  | T | C |
| wt37-7-63617544 | 63.617544 | 0.672 | Intron | Nonsplice Site |  |  | G | A |
| wt37-7-63619041 | 63.619041 |       | Intron | Nonsplice Site |  |  | A | G |
| wt37-7-63620848 | 63.620848 |       | Intron | Nonsplice Site |  |  | C | T |
| wt37-7-63620873 | 63.620873 |       | Intron | Nonsplice Site |  |  | C | A |
| wt37-7-63620899 | 63.620899 |       | Intron | Nonsplice Site |  |  | T | C |
| wt37-7-63620906 | 63.620906 |       | Intron | Nonsplice Site |  |  | C | T |
| wt37-7-63620967 | 63.620967 |       | Intron | Nonsplice Site |  |  | C | T |
| rs32438536      | 63.621177 |       | Intron | Nonsplice Site |  |  | G | T |
| MRS2085797      | 63.62119  |       | Intron | Nonsplice Site |  |  | C | T |
| wt37-7-63621208 | 63.621208 |       | Intron | Nonsplice Site |  |  | C | T |
| wt37-7-63621346 | 63.621346 | 0.699 | Intron | Nonsplice Site |  |  | C | T |
| wt37-7-63621407 | 63.621407 | 0.699 | Intron | Nonsplice Site |  |  | A | G |
| wt37-7-63621463 | 63.621463 | 0.699 | Intron | Nonsplice Site |  |  | A | G |
| wt37-7-63621484 | 63.621484 | 0.699 | Intron | Nonsplice Site |  |  | A | T |
| wt37-7-63621545 | 63.621545 | 0.699 | Intron | Nonsplice Site |  |  | T | C |
| wt37-7-63621562 | 63.621562 | 0.699 | Intron | Nonsplice Site |  |  | T | C |
| wt37-7-63621584 | 63.621584 | 0.699 | Intron | Nonsplice Site |  |  | T | C |
| wt37-7-63621646 | 63.621646 | 0.699 | Intron | Nonsplice Site |  |  | A | G |
| MRS2085807      | 63.621663 | 0.699 | Intron | Nonsplice Site |  |  | C | A |
| wt37-7-63621687 | 63.621687 | 0.699 | Intron | Nonsplice Site |  |  | T | C |
| wt37-7-63621734 | 63.621734 |       | Intron | Nonsplice Site |  |  | C | T |
| wt37-7-63621738 | 63.621738 |       | Intron | Nonsplice Site |  |  | C | T |

|                 |           |       |        |                |  |  |   |   |
|-----------------|-----------|-------|--------|----------------|--|--|---|---|
| wt37-7-63621791 | 63.621791 |       | Intron | Nonsplice Site |  |  | T | C |
| wt37-7-63621806 | 63.621806 | 0.783 | Intron | Nonsplice Site |  |  | T | C |
| wt37-7-63621832 | 63.621832 | 0.783 | Intron | Nonsplice Site |  |  | A | G |
| wt37-7-63621844 | 63.621844 | 0.783 | Intron | Nonsplice Site |  |  | C | A |
| wt37-7-63621871 | 63.621871 | 0.783 | Intron | Nonsplice Site |  |  | C | T |
| wt37-7-63622072 | 63.622072 | 0.783 | Intron | Nonsplice Site |  |  | T | G |
| wt37-7-63622107 | 63.622107 | 0.783 | Intron | Nonsplice Site |  |  | G | A |
| wt37-7-63622140 | 63.62214  | 0.783 | Intron | Nonsplice Site |  |  | C | A |
| wt37-7-63622246 | 63.622246 | 0.783 | Intron | Nonsplice Site |  |  | T | C |
| wt37-7-63622257 | 63.622257 | 0.783 | Intron | Nonsplice Site |  |  | C | T |
| wt37-7-63622440 | 63.62244  | 0.783 | Intron | Nonsplice Site |  |  | G | A |
| wt37-7-63622681 | 63.622681 | 0.783 | Intron | Nonsplice Site |  |  | A | C |
| wt37-7-63622763 | 63.622763 | 0.783 | Intron | Nonsplice Site |  |  | A | G |
| wt37-7-63623098 | 63.623098 | 0.104 | Intron | Nonsplice Site |  |  | C | T |
| wt37-7-63623168 | 63.623168 |       | Intron | Nonsplice Site |  |  | T | C |
| wt37-7-63623398 | 63.623398 | 0.636 | Intron | Nonsplice Site |  |  | T | C |
| wt37-7-63623446 | 63.623446 | 0.636 | Intron | Nonsplice Site |  |  | T | G |
| wt37-7-63623554 | 63.623554 | 0.636 | Intron | Nonsplice Site |  |  | C | T |
| wt37-7-63623596 | 63.623596 | 0.636 | Intron | Nonsplice Site |  |  | C | T |
| wt37-7-63623641 | 63.623641 | 0.636 | Intron | Nonsplice Site |  |  | A | G |
| wt37-7-63624063 | 63.624063 | 0.636 | Intron | Nonsplice Site |  |  | A | G |
| wt37-7-63624084 | 63.624084 |       | Intron | Nonsplice Site |  |  | A | T |
| wt37-7-63624112 | 63.624112 |       | Intron | Nonsplice Site |  |  | A | T |
| wt37-7-63624129 | 63.624129 |       | Intron | Nonsplice Site |  |  | C | T |
| wt37-7-63624137 | 63.624137 |       | Intron | Nonsplice Site |  |  | C | T |
| wt37-7-63624569 | 63.624569 | 0.908 | Intron | Nonsplice Site |  |  | C | T |
| wt37-7-63624577 | 63.624577 | 0.908 | Intron | Nonsplice Site |  |  | C | A |

|                 |           |       |        |                |  |  |   |   |
|-----------------|-----------|-------|--------|----------------|--|--|---|---|
| wt37-7-63624579 | 63.624579 | 0.908 | Intron | Nonsplice Site |  |  | T | C |
| wt37-7-63624713 | 63.624713 | 0.908 | Intron | Nonsplice Site |  |  | A | G |
| wt37-7-63625020 | 63.62502  | 0.908 | Intron | Nonsplice Site |  |  | T | C |
| wt37-7-63625335 | 63.625335 | 0.635 | Intron | Nonsplice Site |  |  | A | C |
| wt37-7-63625359 | 63.625359 | 0.635 | Intron | Nonsplice Site |  |  | A | C |
| wt37-7-63625989 | 63.625989 |       | Intron | Nonsplice Site |  |  | C | A |
| wt37-7-63626289 | 63.626289 |       | Intron | Nonsplice Site |  |  | G | A |
| wt37-7-63626445 | 63.626445 |       | Intron | Nonsplice Site |  |  | A | T |
| MRS2085841      | 63.627446 |       | Intron | Nonsplice Site |  |  | T | A |
| MRS2085842      | 63.627912 |       | Intron | Nonsplice Site |  |  | A | G |
| wt37-7-63628779 | 63.628779 |       | Intron | Nonsplice Site |  |  | A | G |
| MRS2085844      | 63.629413 |       | Intron | Nonsplice Site |  |  | G | A |
| wt37-7-63630080 | 63.63008  | 0.453 | Intron | Nonsplice Site |  |  | C | A |
| wt37-7-63630360 | 63.63036  | 0.453 | Intron | Nonsplice Site |  |  | C | T |
| wt37-7-63633652 | 63.633652 |       | Intron | Nonsplice Site |  |  | C | G |
| wt37-7-63634026 | 63.634026 |       | Intron | Nonsplice Site |  |  | T | C |
| wt37-7-63634769 | 63.634769 |       | Intron | Nonsplice Site |  |  | C | T |
| wt37-7-63635098 | 63.635098 |       | Intron | Nonsplice Site |  |  | A | G |
| wt37-7-63635276 | 63.635276 |       | Intron | Nonsplice Site |  |  | C | T |
| wt37-7-63636582 | 63.636582 |       | Intron | Nonsplice Site |  |  | A | G |
| wt37-7-63637175 | 63.637175 |       | Intron | Nonsplice Site |  |  | G | A |
| wt37-7-63637985 | 63.637985 | 0.989 | Intron | Nonsplice Site |  |  | A | T |
| wt37-7-63639501 | 63.639501 | 0.599 | Intron | Nonsplice Site |  |  | G | A |
| wt37-7-63639632 | 63.639632 |       | Intron | Nonsplice Site |  |  | A | C |
| wt37-7-63640604 | 63.640604 | 0.875 | Intron | Nonsplice Site |  |  | A | G |
| wt37-7-63640660 | 63.64066  | 0.875 | Intron | Nonsplice Site |  |  | G | T |
| MRS2085859      | 63.641132 | 0.875 | Intron | Nonsplice Site |  |  | A | C |

|                 |           |       |        |                |  |  |   |   |
|-----------------|-----------|-------|--------|----------------|--|--|---|---|
| wt37-7-63642074 | 63.642074 | 0.524 | Intron | Nonsplice Site |  |  | A | C |
| wt37-7-63642395 | 63.642395 |       | Intron | Nonsplice Site |  |  | G | A |
| MRS2085862      | 63.642826 |       | Intron | Nonsplice Site |  |  | G | T |
| wt37-7-63643038 | 63.643038 |       | Intron | Nonsplice Site |  |  | A | G |
| wt37-7-63643994 | 63.643994 | 0.467 | Intron | Nonsplice Site |  |  | A | C |
| wt37-7-63644733 | 63.644733 |       | Intron | Nonsplice Site |  |  | T | A |
| wt37-7-63645110 | 63.64511  | 0.99  | Intron | Nonsplice Site |  |  | C | T |
| wt37-7-63645240 | 63.64524  | 0.99  | Intron | Nonsplice Site |  |  | T | C |
| wt37-7-63645865 | 63.645865 | 0.424 | Intron | Nonsplice Site |  |  | C | T |
| wt37-7-63646326 | 63.646326 | 0.424 | Intron | Nonsplice Site |  |  | T | C |
| wt37-7-63646533 | 63.646533 | 0.424 | Intron | Nonsplice Site |  |  | C | T |
| wt37-7-63646571 | 63.646571 | 0.424 | Intron | Nonsplice Site |  |  | A | T |
| wt37-7-63647777 | 63.647777 | 0.334 | Intron | Nonsplice Site |  |  | A | G |
| wt37-7-63647984 | 63.647984 | 0.334 | Intron | Nonsplice Site |  |  | A | G |
| rs31137281      | 63.648167 |       | Intron | Nonsplice Site |  |  | A | G |
| wt37-7-63648190 | 63.64819  | 0.334 | Intron | Nonsplice Site |  |  | A | G |
| wt37-7-63648553 | 63.648553 | 0.334 | Intron | Nonsplice Site |  |  | G | A |
| wt37-7-63648695 | 63.648695 | 0.334 | Intron | Nonsplice Site |  |  | A | C |
| rs32980581      | 63.648753 |       | Intron | Nonsplice Site |  |  | A | G |
| MRS2085876      | 63.64899  |       | Intron | Nonsplice Site |  |  | C | G |
| wt37-7-63649120 | 63.64912  |       | Intron | Nonsplice Site |  |  | C | T |
| MRS2085878      | 63.64949  |       | Intron | Nonsplice Site |  |  | G | A |
| MRS2085879      | 63.649509 |       | Intron | Nonsplice Site |  |  | G | C |
| MRS2085880      | 63.649726 |       | Intron | Nonsplice Site |  |  | G | A |
| MRS2085881      | 63.649758 |       | Intron | Nonsplice Site |  |  | A | T |
| wt37-7-63650520 | 63.65052  |       | Intron | Nonsplice Site |  |  | T | A |
| MRS2085882      | 63.651562 |       | Intron | Nonsplice Site |  |  | G | A |

|                 |           |       |        |                |  |  |   |   |
|-----------------|-----------|-------|--------|----------------|--|--|---|---|
| wt37-7-63651638 | 63.651638 |       | Intron | Nonsplice Site |  |  | T | C |
| MRS2085884      | 63.651708 |       | Intron | Nonsplice Site |  |  | A | C |
| MRS2085885      | 63.651709 |       | Intron | Nonsplice Site |  |  | G | C |
| MRS2085886      | 63.651989 |       | Intron | Nonsplice Site |  |  | T | G |
| MRS2085887      | 63.652164 |       | Intron | Nonsplice Site |  |  | C | G |
| wt37-7-63654988 | 63.654988 | 0.663 | Intron | Nonsplice Site |  |  | T | C |
| wt37-7-63657831 | 63.657831 | 0.927 | Intron | Nonsplice Site |  |  | G | A |
| wt37-7-63657940 | 63.65794  | 0.927 | Intron | Nonsplice Site |  |  | G | A |
| wt37-7-63658492 | 63.658492 | 0.927 | Intron | Nonsplice Site |  |  | T | C |
| wt37-7-63659961 | 63.659961 | 0.409 | Intron | Nonsplice Site |  |  | G | A |
| rs31388052      | 63.660108 |       | Intron | Nonsplice Site |  |  | C | A |
| wt37-7-63660113 | 63.660113 | 0.409 | Intron | Nonsplice Site |  |  | C | A |
| wt37-7-63661481 | 63.661481 |       | Intron | Nonsplice Site |  |  | T | C |
| wt37-7-63663028 | 63.663028 | 0.888 | Intron | Nonsplice Site |  |  | C | T |
| wt37-7-63663029 | 63.663029 | 0.888 | Intron | Nonsplice Site |  |  | C | T |
| wt37-7-63663649 | 63.663649 | 0.888 | Intron | Nonsplice Site |  |  | C | T |
| wt37-7-63665387 | 63.665387 | 0.787 | Intron | Nonsplice Site |  |  | T | C |
| wt37-7-63666251 | 63.666251 | 0.696 | Intron | Nonsplice Site |  |  | C | T |
| wt37-7-63666324 | 63.666324 | 0.696 | Intron | Nonsplice Site |  |  | A | T |
| wt37-7-63666784 | 63.666784 | 0.708 | Intron | Nonsplice Site |  |  | T | C |
| wt37-7-63667302 | 63.667302 | 0.708 | Intron | Nonsplice Site |  |  | T | C |
| wt37-7-63668964 | 63.668964 | 1     | Intron | Nonsplice Site |  |  | A | C |
| wt37-7-63669068 | 63.669068 | 1     | Intron | Nonsplice Site |  |  | T | A |
| wt37-7-63669522 | 63.669522 | 1     | Intron | Nonsplice Site |  |  | A | G |
| wt37-7-63670458 | 63.670458 | 1     | Intron | Nonsplice Site |  |  | A | G |
| wt37-7-63670548 | 63.670548 | 1     | Intron | Nonsplice Site |  |  | C | T |
| wt37-7-63671117 | 63.671117 | 0.91  | Intron | Nonsplice Site |  |  | G | A |

|                 |           |       |        |                |  |  |   |   |
|-----------------|-----------|-------|--------|----------------|--|--|---|---|
| wt37-7-63671275 | 63.671275 | 0.91  | Intron | Nonsplice Site |  |  | C | T |
| wt37-7-63671397 | 63.671397 | 0.91  | Intron | Nonsplice Site |  |  | G | A |
| wt37-7-63671627 | 63.671627 |       | Intron | Nonsplice Site |  |  | T | C |
| wt37-7-63671628 | 63.671628 |       | Intron | Nonsplice Site |  |  | T | C |
| wt37-7-63671695 | 63.671695 |       | Intron | Nonsplice Site |  |  | C | T |
| wt37-7-63671754 | 63.671754 |       | Intron | Nonsplice Site |  |  | T | C |
| wt37-7-63672467 | 63.672467 | 0.942 | Intron | Nonsplice Site |  |  | G | A |
| wt37-7-63672571 | 63.672571 | 0.942 | Intron | Nonsplice Site |  |  | T | C |
| wt37-7-63673787 | 63.673787 | 0.947 | Intron | Nonsplice Site |  |  | C | T |
| wt37-7-63673855 | 63.673855 | 0.947 | Intron | Nonsplice Site |  |  | A | T |
| wt37-7-63673903 | 63.673903 | 0.947 | Intron | Nonsplice Site |  |  | T | C |
| wt37-7-63674065 | 63.674065 | 0.947 | Intron | Nonsplice Site |  |  | A | T |
| wt37-7-63674070 | 63.67407  | 0.947 | Intron | Nonsplice Site |  |  | A | G |
| wt37-7-63674076 | 63.674076 | 0.947 | Intron | Nonsplice Site |  |  | T | C |
| wt37-7-63674083 | 63.674083 | 0.947 | Intron | Nonsplice Site |  |  | T | C |
| wt37-7-63674220 | 63.67422  | 0.947 | Intron | Nonsplice Site |  |  | T | C |
| wt37-7-63674254 | 63.674254 | 0.947 | Intron | Nonsplice Site |  |  | T | C |
| wt37-7-63674363 | 63.674363 | 0.947 | Intron | Nonsplice Site |  |  | C | A |
| MRS2085924      | 63.674399 | 0.947 | Intron | Nonsplice Site |  |  | T | G |
| wt37-7-63674450 | 63.67445  | 0.947 | Intron | Nonsplice Site |  |  | T | C |
| wt37-7-63674514 | 63.674514 | 1     | Intron | Nonsplice Site |  |  | T | C |
| MRS2085927      | 63.674762 | 1     | Intron | Nonsplice Site |  |  | C | T |
| wt37-7-63675050 | 63.67505  | 1     | Intron | Nonsplice Site |  |  | G | A |
| wt37-7-63675203 | 63.675203 | 1     | Intron | Nonsplice Site |  |  | C | A |
| wt37-7-63675304 | 63.675304 | 1     | Intron | Nonsplice Site |  |  | A | G |
| wt37-7-63675460 | 63.67546  | 1     | Intron | Nonsplice Site |  |  | T | C |
| wt37-7-63675710 | 63.67571  | 0.189 | Intron | Nonsplice Site |  |  | T | C |

|                 |           |       |        |                |  |   |   |
|-----------------|-----------|-------|--------|----------------|--|---|---|
| wt37-7-63676383 | 63.676383 | 0.859 | Intron | Nonsplice Site |  | C | T |
| wt37-7-63676441 | 63.676441 | 0.859 | Intron | Nonsplice Site |  | G | T |
| wt37-7-63676478 | 63.676478 | 0.859 | Intron | Nonsplice Site |  | G | A |
| wt37-7-63676511 | 63.676511 | 0.859 | Intron | Nonsplice Site |  | T | G |
| wt37-7-63677007 | 63.677007 | 0.859 | Intron | Nonsplice Site |  | A | G |
| wt37-7-63677155 | 63.677155 |       | Intron | Nonsplice Site |  | A | G |
| wt37-7-63677206 | 63.677206 |       | Intron | Nonsplice Site |  | G | A |
| wt37-7-63677210 | 63.67721  |       | Intron | Nonsplice Site |  | G | A |
| wt37-7-63677355 | 63.677355 | 0.296 | Intron | Nonsplice Site |  | C | T |
| wt37-7-63677760 | 63.67776  |       | Intron | Nonsplice Site |  | C | G |
| wt37-7-63677791 | 63.677791 |       | Intron | Nonsplice Site |  | A | G |
| MRS2085941      | 63.678092 |       | Intron | Nonsplice Site |  | G | A |
| wt37-7-63678461 | 63.678461 | 1     | Intron | Nonsplice Site |  | G | A |
| wt37-7-63678472 | 63.678472 | 1     | Intron | Nonsplice Site |  | T | G |
| wt37-7-63678584 | 63.678584 | 1     | Intron | Nonsplice Site |  | T | C |
| wt37-7-63678764 | 63.678764 | 1     | Intron | Nonsplice Site |  | G | A |
| wt37-7-63678824 | 63.678824 | 1     | Intron | Nonsplice Site |  | A | C |
| wt37-7-63678992 | 63.678992 | 1     | Intron | Nonsplice Site |  | A | C |
| rs32980171      | 63.679138 |       | Intron | Nonsplice Site |  | G | A |
| wt37-7-63679151 | 63.679151 | 1     | Intron | Nonsplice Site |  | G | A |
| wt37-7-63679177 | 63.679177 | 1     | Intron | Nonsplice Site |  | A | G |
| wt37-7-63679245 | 63.679245 | 0.979 | Intron | Nonsplice Site |  | G | A |
| wt37-7-63679674 | 63.679674 | 0.979 | Intron | Nonsplice Site |  | T | C |
| wt37-7-63680169 | 63.680169 | 0.979 | Intron | Nonsplice Site |  | T | C |
| wt37-7-63680545 | 63.680545 | 0.465 | Intron | Nonsplice Site |  | A | G |
| wt37-7-63680766 | 63.680766 | 0.465 | Intron | Nonsplice Site |  | A | T |
| wt37-7-63680838 | 63.680838 | 0.465 | Intron | Nonsplice Site |  | G | T |



|                 |           |       |         |                |               |                                                  |   |   |
|-----------------|-----------|-------|---------|----------------|---------------|--------------------------------------------------|---|---|
| wt37-7-63681352 | 63.681352 | 0.565 | Intron  | Nonsplice Site |               |                                                  | T | C |
| wt37-7-63682507 | 63.682507 |       | Intron  | Nonsplice Site |               |                                                  | A | C |
| MRS2085957      | 63.682801 |       | Intron  | Nonsplice Site |               |                                                  | A | C |
| wt37-7-63683682 | 63.683682 | 0.377 | Intron  | Nonsplice Site |               |                                                  | A | G |
| wt37-7-63684421 | 63.684421 | 0.377 | Intron  | Nonsplice Site |               |                                                  | A | C |
| wt37-7-63684738 | 63.684738 | 1     | Exon 23 | Coding         | Nonsynonymous | Biotype: Protein Coding, K -> Q, Aag -> Cag, 794 | A | C |
| wt37-7-63685237 | 63.685237 | 1     | Intron  | Nonsplice Site |               |                                                  | C | T |
| wt37-7-63685702 | 63.685702 | 0.374 | Intron  | Nonsplice Site |               |                                                  | G | T |
| wt37-7-63686055 | 63.686055 | 0.374 | Intron  | Nonsplice Site |               |                                                  | C | T |
| wt37-7-63686329 | 63.686329 | 0.374 | Intron  | Nonsplice Site |               |                                                  | G | A |
| wt37-7-63686513 | 63.686513 | 0.374 | Intron  | Nonsplice Site |               |                                                  | T | A |
| wt37-7-63686669 | 63.686669 |       | Intron  | Nonsplice Site |               |                                                  | C | T |
| wt37-7-63687254 | 63.687254 |       | Intron  | Nonsplice Site |               |                                                  | G | A |
| wt37-7-63687744 | 63.687744 | 0.643 | Intron  | Nonsplice Site |               |                                                  | A | C |
| wt37-7-63687745 | 63.687745 | 0.643 | Intron  | Nonsplice Site |               |                                                  | A | C |
| wt37-7-63688029 | 63.688029 | 0.643 | Intron  | Nonsplice Site |               |                                                  | G | A |
| wt37-7-63689473 | 63.689473 | 0.355 | Intron  | Nonsplice Site |               |                                                  | C | T |
| wt37-7-63690599 | 63.690599 | 0.679 | Intron  | Nonsplice Site |               |                                                  | C | T |
| wt37-7-63690617 | 63.690617 | 0.679 | Intron  | Nonsplice Site |               |                                                  | T | A |
| MRS2085974      | 63.693302 |       | Intron  | Nonsplice Site |               |                                                  | G | T |
| MRS2085975      | 63.693343 |       | Intron  | Nonsplice Site |               |                                                  | G | C |
| wt37-7-63694002 | 63.694002 |       | Intron  | Nonsplice Site |               |                                                  | C | T |
| MRS2085977      | 63.694412 | 0.831 | Intron  | Nonsplice Site |               |                                                  | G | C |
| MRS2085978      | 63.69681  | 0.632 | Intron  | Nonsplice Site |               |                                                  | C | T |
| wt37-7-63697901 | 63.697901 | 0.818 | Intron  | Nonsplice Site |               |                                                  | T | C |
| wt37-7-63698958 | 63.698958 | 0.847 | Intron  | Nonsplice Site |               |                                                  | A | C |
| wt37-7-63699757 | 63.699757 |       | Intron  | Nonsplice Site |               |                                                  | A | G |

|                 |           |       |        |                |  |   |   |
|-----------------|-----------|-------|--------|----------------|--|---|---|
| wt37-7-63699764 | 63.699764 |       | Intron | Nonsplice Site |  | A | G |
| MRS2085982      | 63.699785 |       | Intron | Nonsplice Site |  | G | A |
| wt37-7-63699914 | 63.699914 | 0.497 | Intron | Nonsplice Site |  | T | G |
| wt37-7-63700049 | 63.700049 | 0.497 | Intron | Nonsplice Site |  | C | A |
| wt37-7-63700123 | 63.700123 | 0.497 | Intron | Nonsplice Site |  | T | C |
| wt37-7-63700222 | 63.700222 | 0.497 | Intron | Nonsplice Site |  | A | G |
| wt37-7-63700263 | 63.700263 | 0.497 | Intron | Nonsplice Site |  | T | C |
| wt37-7-63700289 | 63.700289 | 0.497 | Intron | Nonsplice Site |  | A | G |
| wt37-7-63700933 | 63.700933 | 0.666 | Intron | Nonsplice Site |  | C | T |
| wt37-7-63701083 | 63.701083 | 0.666 | Intron | Nonsplice Site |  | T | G |
| wt37-7-63701103 | 63.701103 | 0.666 | Intron | Nonsplice Site |  | A | G |
| wt37-7-63701116 | 63.701116 | 0.666 | Intron | Nonsplice Site |  | C | T |
| MRS2085992      | 63.701204 |       | Intron | Nonsplice Site |  | T | C |
| MRS2085993      | 63.701208 |       | Intron | Nonsplice Site |  | T | C |
| wt37-7-63701298 | 63.701298 |       | Intron | Nonsplice Site |  | T | C |
| wt37-7-63701302 | 63.701302 |       | Intron | Nonsplice Site |  | C | T |
| wt37-7-63701372 | 63.701372 |       | Intron | Nonsplice Site |  | G | T |
| wt37-7-63701524 | 63.701524 |       | Intron | Nonsplice Site |  | G | A |
| wt37-7-63701591 | 63.701591 |       | Intron | Nonsplice Site |  | C | T |
| wt37-7-63701682 | 63.701682 |       | Intron | Nonsplice Site |  | T | C |
| wt37-7-63701890 | 63.70189  |       | Intron | Nonsplice Site |  | T | A |
| wt37-7-63702029 | 63.702029 |       | Intron | Nonsplice Site |  | A | C |
| wt37-7-63702030 | 63.70203  |       | Intron | Nonsplice Site |  | T | C |
| wt37-7-63702085 | 63.702085 |       | Intron | Nonsplice Site |  | C | A |
| wt37-7-63702086 | 63.702086 |       | Intron | Nonsplice Site |  | C | T |
| wt37-7-63702228 | 63.702228 |       | Intron | Nonsplice Site |  | T | A |
| wt37-7-63702920 | 63.70292  |       | Intron | Nonsplice Site |  | A | C |

|                 |           |  |        |                |  |  |   |   |
|-----------------|-----------|--|--------|----------------|--|--|---|---|
| MRS2086003      | 63.703062 |  | Intron | Nonsplice Site |  |  | T | C |
| MRS2086004      | 63.703076 |  | Intron | Nonsplice Site |  |  | A | G |
| MRS2086005      | 63.703088 |  | Intron | Nonsplice Site |  |  | G | C |
| MRS2086006      | 63.703176 |  | Intron | Nonsplice Site |  |  | G | T |
| wt37-7-63703375 | 63.703375 |  | Intron | Nonsplice Site |  |  | A | G |
| wt37-7-63703394 | 63.703394 |  | Intron | Nonsplice Site |  |  | G | T |
| MRS2086010      | 63.70351  |  | Intron | Nonsplice Site |  |  | A | T |
| MRS2086011      | 63.70369  |  | Intron | Nonsplice Site |  |  | T | C |
| MRS2086012      | 63.70401  |  | Intron | Nonsplice Site |  |  | C | T |
| wt37-7-63704068 | 63.704068 |  | Intron | Nonsplice Site |  |  | A | T |
| wt37-7-63704265 | 63.704265 |  | Intron | Nonsplice Site |  |  | T | A |
| wt37-7-63704270 | 63.70427  |  | Intron | Nonsplice Site |  |  | A | T |
| MRS2086014      | 63.704337 |  | Intron | Nonsplice Site |  |  | A | C |
| rs31079026      | 63.704505 |  | Intron | Nonsplice Site |  |  | G | C |
| rs31150144      | 63.704506 |  | Intron | Nonsplice Site |  |  | G | T |
| MRS2086015      | 63.704625 |  | Intron | Nonsplice Site |  |  | T | A |
| MRS2086016      | 63.704727 |  | Intron | Nonsplice Site |  |  | G | A |
| MRS2086017      | 63.704731 |  | Intron | Nonsplice Site |  |  | C | A |
| MRS2086018      | 63.705098 |  | Intron | Nonsplice Site |  |  | C | T |
| MRS2086019      | 63.705371 |  | Intron | Nonsplice Site |  |  | T | G |
| MRS2086020      | 63.705433 |  | Intron | Nonsplice Site |  |  | C | G |
| MRS2086021      | 63.705482 |  | Intron | Nonsplice Site |  |  | G | T |
| wt37-7-63706105 | 63.706105 |  | Intron | Nonsplice Site |  |  | T | C |
| wt37-7-63706132 | 63.706132 |  | Intron | Nonsplice Site |  |  | A | C |
| wt37-7-63706179 | 63.706179 |  | Intron | Nonsplice Site |  |  | T | C |
| wt37-7-63706190 | 63.70619  |  | Intron | Nonsplice Site |  |  | T | C |
| wt37-7-63706214 | 63.706214 |  | Intron | Nonsplice Site |  |  | T | C |

|                 |           |  |        |                |  |  |   |   |
|-----------------|-----------|--|--------|----------------|--|--|---|---|
| wt37-7-63706256 | 63.706256 |  | Intron | Nonsplice Site |  |  | G | C |
| wt37-7-63706336 | 63.706336 |  | Intron | Nonsplice Site |  |  | G | A |
| wt37-7-63706344 | 63.706344 |  | Intron | Nonsplice Site |  |  | A | G |
| wt37-7-63706647 | 63.706647 |  | Intron | Nonsplice Site |  |  | G | A |
| wt37-7-63706724 | 63.706724 |  | Intron | Nonsplice Site |  |  | C | T |
| wt37-7-63706761 | 63.706761 |  | Intron | Nonsplice Site |  |  | G | A |
| wt37-7-63706775 | 63.706775 |  | Intron | Nonsplice Site |  |  | T | G |
| wt37-7-63706790 | 63.70679  |  | Intron | Nonsplice Site |  |  | G | A |
| wt37-7-63706852 | 63.706852 |  | Intron | Nonsplice Site |  |  | T | C |
| wt37-7-63706897 | 63.706897 |  | Intron | Nonsplice Site |  |  | G | C |
| wt37-7-63707051 | 63.707051 |  | Intron | Nonsplice Site |  |  | T | A |
| wt37-7-63707093 | 63.707093 |  | Intron | Nonsplice Site |  |  | T | A |
| wt37-7-63707425 | 63.707425 |  | Intron | Nonsplice Site |  |  | G | A |
| wt37-7-63707481 | 63.707481 |  | Intron | Nonsplice Site |  |  | C | A |
| wt37-7-63707518 | 63.707518 |  | Intron | Nonsplice Site |  |  | G | T |
| wt37-7-63707577 | 63.707577 |  | Intron | Nonsplice Site |  |  | A | T |
| wt37-7-63707634 | 63.707634 |  | Intron | Nonsplice Site |  |  | C | T |
| wt37-7-63707660 | 63.70766  |  | Intron | Nonsplice Site |  |  | T | C |
| wt37-7-63707702 | 63.707702 |  | Intron | Nonsplice Site |  |  | T | A |
| wt37-7-63707819 | 63.707819 |  | Intron | Nonsplice Site |  |  | C | T |
| MRS2086044      | 63.707853 |  | Intron | Nonsplice Site |  |  | T | C |
| wt37-7-63707955 | 63.707955 |  | Intron | Nonsplice Site |  |  | A | G |
| wt37-7-63708020 | 63.70802  |  | Intron | Nonsplice Site |  |  | A | G |
| wt37-7-63708079 | 63.708079 |  | Intron | Nonsplice Site |  |  | C | T |
| wt37-7-63708082 | 63.708082 |  | Intron | Nonsplice Site |  |  | T | C |
| wt37-7-63708086 | 63.708086 |  | Intron | Nonsplice Site |  |  | T | C |
| wt37-7-63708090 | 63.70809  |  | Intron | Nonsplice Site |  |  | T | C |

|                 |           |       |        |                |  |   |   |
|-----------------|-----------|-------|--------|----------------|--|---|---|
| wt37-7-63708131 | 63.708131 |       | Intron | Nonsplice Site |  | C | T |
| wt37-7-63708217 | 63.708217 |       | Intron | Nonsplice Site |  | C | T |
| wt37-7-63708234 | 63.708234 |       | Intron | Nonsplice Site |  | C | T |
| wt37-7-63708238 | 63.708238 |       | Intron | Nonsplice Site |  | C | T |
| wt37-7-63708305 | 63.708305 |       | Intron | Nonsplice Site |  | T | G |
| wt37-7-63708381 | 63.708381 |       | Intron | Nonsplice Site |  | C | A |
| wt37-7-63708395 | 63.708395 |       | Intron | Nonsplice Site |  | G | A |
| wt37-7-63708418 | 63.708418 |       | Intron | Nonsplice Site |  | T | G |
| MRS2086052      | 63.708483 |       | Intron | Nonsplice Site |  | G | A |
| wt37-7-63708487 | 63.708487 |       | Intron | Nonsplice Site |  | G | A |
| wt37-7-63708499 | 63.708499 |       | Intron | Nonsplice Site |  | A | G |
| wt37-7-63708551 | 63.708551 |       | Intron | Nonsplice Site |  | C | A |
| wt37-7-63708730 | 63.70873  |       | Intron | Nonsplice Site |  | G | A |
| wt37-7-63708776 | 63.708776 |       | Intron | Nonsplice Site |  | T | G |
| wt37-7-63708862 | 63.708862 |       | Intron | Nonsplice Site |  | C | G |
| wt37-7-63708903 | 63.708903 |       | Intron | Nonsplice Site |  | T | C |
| wt37-7-63708989 | 63.708989 |       | Intron | Nonsplice Site |  | A | T |
| wt37-7-63708997 | 63.708997 |       | Intron | Nonsplice Site |  | T | A |
| wt37-7-63709049 | 63.709049 |       | Intron | Nonsplice Site |  | C | A |
| wt37-7-63709073 | 63.709073 |       | Intron | Nonsplice Site |  | T | C |
| wt37-7-63709133 | 63.709133 |       | Intron | Nonsplice Site |  | A | G |
| wt37-7-63709140 | 63.70914  |       | Intron | Nonsplice Site |  | T | C |
| wt37-7-63709177 | 63.709177 |       | Intron | Nonsplice Site |  | T | C |
| wt37-7-63709244 | 63.709244 | 0.158 | Intron | Nonsplice Site |  | C | T |
| wt37-7-63709298 | 63.709298 | 0.158 | Intron | Nonsplice Site |  | C | T |
| wt37-7-63709300 | 63.7093   | 0.158 | Intron | Nonsplice Site |  | G | T |
| wt37-7-63709439 | 63.709439 | 0.158 | Intron | Nonsplice Site |  | A | G |

|                 |           |       |        |                |  |  |   |   |
|-----------------|-----------|-------|--------|----------------|--|--|---|---|
| wt37-7-63709454 | 63.709454 | 0.158 | Intron | Nonsplice Site |  |  | G | A |
| wt37-7-63709537 | 63.709537 | 0.158 | Intron | Nonsplice Site |  |  | T | G |
| MRS2086072      | 63.709652 | 0.158 | Intron | Nonsplice Site |  |  | T | C |
| wt37-7-63709657 | 63.709657 | 0.158 | Intron | Nonsplice Site |  |  | T | C |
| wt37-7-63709736 | 63.709736 | 0.158 | Intron | Nonsplice Site |  |  | T | C |
| wt37-7-63709766 | 63.709766 | 0.158 | Intron | Nonsplice Site |  |  | G | A |
| wt37-7-63709777 | 63.709777 |       | Intron | Nonsplice Site |  |  | A | G |
| wt37-7-63709847 | 63.709847 |       | Intron | Nonsplice Site |  |  | T | A |
| MRS2086077      | 63.709865 |       | Intron | Nonsplice Site |  |  | G | T |
| wt37-7-63709874 | 63.709874 |       | Intron | Nonsplice Site |  |  | G | T |
| wt37-7-63709889 | 63.709889 |       | Intron | Nonsplice Site |  |  | G | A |
| wt37-7-63709985 | 63.709985 | 0.36  | Intron | Nonsplice Site |  |  | T | C |
| MRS2086080      | 63.709989 | 0.36  | Intron | Nonsplice Site |  |  | T | A |
| wt37-7-63710005 | 63.710005 | 0.36  | Intron | Nonsplice Site |  |  | G | A |
| wt37-7-63710057 | 63.710057 | 0.36  | Intron | Nonsplice Site |  |  | T | A |
| wt37-7-63710090 | 63.71009  | 0.36  | Intron | Nonsplice Site |  |  | G | C |
| wt37-7-63710180 | 63.71018  | 0.36  | Intron | Nonsplice Site |  |  | C | T |
| wt37-7-63710242 | 63.710242 | 0.36  | Intron | Nonsplice Site |  |  | C | T |
| wt37-7-63710259 | 63.710259 | 0.36  | Intron | Nonsplice Site |  |  | C | T |
| wt37-7-63710307 | 63.710307 | 0.36  | Intron | Nonsplice Site |  |  | T | C |
| wt37-7-63710368 | 63.710368 | 0.36  | Intron | Nonsplice Site |  |  | A | G |
| wt37-7-63710401 | 63.710401 | 0.36  | Intron | Nonsplice Site |  |  | T | C |
| wt37-7-63710438 | 63.710438 | 0.36  | Intron | Nonsplice Site |  |  | G | A |
| wt37-7-63710568 | 63.710568 | 0.36  | Intron | Nonsplice Site |  |  | C | T |
| wt37-7-63710738 | 63.710738 | 0.36  | Intron | Nonsplice Site |  |  | G | A |
| MRS2086093      | 63.710873 |       | Intron | Nonsplice Site |  |  | T | C |
| wt37-7-63710941 | 63.710941 |       | Intron | Nonsplice Site |  |  | T | A |

|                 |           |       |        |                |  |  |   |   |
|-----------------|-----------|-------|--------|----------------|--|--|---|---|
| wt37-7-63711215 | 63.711215 |       | Intron | Nonsplice Site |  |  | T | C |
| wt37-7-63712393 | 63.712393 | 0.791 | Intron | Nonsplice Site |  |  | G | A |
| wt37-7-63712410 | 63.71241  | 0.791 | Intron | Nonsplice Site |  |  | G | T |
| wt37-7-63713522 | 63.713522 |       | Intron | Nonsplice Site |  |  | C | A |
| wt37-7-63714550 | 63.71455  | 0.975 | Intron | Nonsplice Site |  |  | T | A |
| wt37-7-63715518 | 63.715518 | 0.284 | Intron | Nonsplice Site |  |  | A | G |
| rs32357610      | 63.715719 |       | Intron | Nonsplice Site |  |  | A | T |
| wt37-7-63717473 | 63.717473 | 0.972 | Intron | Nonsplice Site |  |  | C | T |
| wt37-7-63717651 | 63.717651 | 0.972 | Intron | Nonsplice Site |  |  | C | T |
| wt37-7-63717829 | 63.717829 | 0.972 | Intron | Nonsplice Site |  |  | T | A |
| wt37-7-63718319 | 63.718319 |       | Intron | Nonsplice Site |  |  | T | A |
| wt37-7-63718477 | 63.718477 |       | Intron | Nonsplice Site |  |  | G | T |
| wt37-7-63718604 | 63.718604 |       | Intron | Nonsplice Site |  |  | C | A |
| wt37-7-63719189 | 63.719189 | 0.464 | Intron | Nonsplice Site |  |  | T | G |
| rs32981636      | 63.719306 |       | Intron | Nonsplice Site |  |  | A | G |
| wt37-7-63719500 | 63.7195   | 0.464 | Intron | Nonsplice Site |  |  | G | T |
| wt37-7-63719820 | 63.71982  | 0.464 | Intron | Nonsplice Site |  |  | G | A |
| wt37-7-63719872 | 63.719872 |       | Intron | Nonsplice Site |  |  | A | G |
| wt37-7-63720092 | 63.720092 |       | Intron | Nonsplice Site |  |  | C | A |
| wt37-7-63720244 | 63.720244 |       | Intron | Nonsplice Site |  |  | G | T |
| wt37-7-63720568 | 63.720568 | 0.523 | Intron | Nonsplice Site |  |  | T | C |
| wt37-7-63720812 | 63.720812 | 0.523 | Intron | Nonsplice Site |  |  | A | T |
| wt37-7-63721085 | 63.721085 |       | Intron | Nonsplice Site |  |  | T | G |
| wt37-7-63721091 | 63.721091 |       | Intron | Nonsplice Site |  |  | T | G |
| MRS2086110      | 63.721199 |       | Intron | Nonsplice Site |  |  | C | T |
| MRS2086111      | 63.72161  |       | Intron | Nonsplice Site |  |  | A | T |
| MRS2086112      | 63.721697 |       | Intron | Nonsplice Site |  |  | C | T |

|                 |           |       |        |                |  |  |   |   |
|-----------------|-----------|-------|--------|----------------|--|--|---|---|
| MRS2086113      | 63.722132 |       | Intron | Nonsplice Site |  |  | T | G |
| MRS2086114      | 63.722135 |       | Intron | Nonsplice Site |  |  | G | T |
| MRS2086115      | 63.722144 |       | Intron | Nonsplice Site |  |  | G | T |
| MRS2086116      | 63.722276 |       | Intron | Nonsplice Site |  |  | G | T |
| MRS2086117      | 63.722423 |       | Intron | Nonsplice Site |  |  | C | T |
| MRS2086119      | 63.724042 |       | Intron | Nonsplice Site |  |  | C | T |
| MRS2086120      | 63.724199 |       | Intron | Nonsplice Site |  |  | A | G |
| MRS2086121      | 63.72433  |       | Intron | Nonsplice Site |  |  | A | G |
| MRS2086122      | 63.724641 |       | Intron | Nonsplice Site |  |  | G | A |
| wt37-7-63724831 | 63.724831 |       | Intron | Nonsplice Site |  |  | G | A |
| wt37-7-63724919 | 63.724919 |       | Intron | Nonsplice Site |  |  | G | A |
| wt37-7-63725533 | 63.725533 | 0.739 | Intron | Nonsplice Site |  |  | A | G |
| wt37-7-63725593 | 63.725593 | 0.739 | Intron | Nonsplice Site |  |  | C | T |
| wt37-7-63725677 | 63.725677 | 0.739 | Intron | Nonsplice Site |  |  | C | T |
| wt37-7-63725839 | 63.725839 | 0.739 | Intron | Nonsplice Site |  |  | T | C |
| wt37-7-63725945 | 63.725945 | 0.739 | Intron | Nonsplice Site |  |  | G | A |
| wt37-7-63726135 | 63.726135 | 0.739 | Intron | Nonsplice Site |  |  | T | G |
| wt37-7-63726168 | 63.726168 | 0.405 | Intron | Nonsplice Site |  |  | G | A |
| wt37-7-63726838 | 63.726838 | 0.554 | Intron | Nonsplice Site |  |  | T | C |
| wt37-7-63727063 | 63.727063 | 0.554 | Intron | Nonsplice Site |  |  | T | C |
| wt37-7-63727560 | 63.72756  | 0.554 | Intron | Nonsplice Site |  |  | A | G |
| wt37-7-63727838 | 63.727838 | 0.779 | Intron | Nonsplice Site |  |  | A | G |
| wt37-7-63727918 | 63.727918 | 0.779 | Intron | Nonsplice Site |  |  | C | T |
| wt37-7-63728017 | 63.728017 | 0.779 | Intron | Nonsplice Site |  |  | G | T |
| wt37-7-63728267 | 63.728267 | 0.779 | Intron | Nonsplice Site |  |  | C | T |
| wt37-7-63728323 | 63.728323 | 0.779 | Intron | Nonsplice Site |  |  | C | G |
| wt37-7-63728342 | 63.728342 | 0.779 | Intron | Nonsplice Site |  |  | A | G |



|                 |           |       |        |                |  |  |   |   |
|-----------------|-----------|-------|--------|----------------|--|--|---|---|
| wt37-7-63728597 | 63.728597 | 0.779 | Intron | Nonsplice Site |  |  | G | A |
| wt37-7-63729138 | 63.729138 | 0.517 | Intron | Nonsplice Site |  |  | T | A |
| wt37-7-63729391 | 63.729391 | 0.517 | Intron | Nonsplice Site |  |  | T | A |
| wt37-7-63729948 | 63.729948 | 0.659 | Intron | Nonsplice Site |  |  | G | A |
| wt37-7-63730674 | 63.730674 | 0.659 | Intron | Nonsplice Site |  |  | C | T |
| wt37-7-63731027 | 63.731027 | 0.685 | Intron | Nonsplice Site |  |  | G | A |
| wt37-7-63731713 | 63.731713 | 0.685 | Intron | Nonsplice Site |  |  | C | T |
| wt37-7-63731794 | 63.731794 | 0.685 | Intron | Nonsplice Site |  |  | A | G |
| wt37-7-63731964 | 63.731964 | 0.086 | Intron | Nonsplice Site |  |  | T | C |
| wt37-7-63732094 | 63.732094 | 0.086 | Intron | Nonsplice Site |  |  | C | T |
| wt37-7-63732142 | 63.732142 | 0.086 | Intron | Nonsplice Site |  |  | C | T |
| wt37-7-63732367 | 63.732367 | 0.086 | Intron | Nonsplice Site |  |  | G | C |
| wt37-7-63732389 | 63.732389 | 0.086 | Intron | Nonsplice Site |  |  | T | C |
| wt37-7-63732737 | 63.732737 | 0.086 | Intron | Nonsplice Site |  |  | A | G |
| wt37-7-63732788 | 63.732788 |       | Intron | Nonsplice Site |  |  | T | A |
| wt37-7-63732789 | 63.732789 |       | Intron | Nonsplice Site |  |  | T | A |
| wt37-7-63732796 | 63.732796 |       | Intron | Nonsplice Site |  |  | T | A |
| wt37-7-63732816 | 63.732816 |       | Intron | Nonsplice Site |  |  | T | G |
| wt37-7-63732829 | 63.732829 |       | Intron | Nonsplice Site |  |  | T | C |
| wt37-7-63732834 | 63.732834 |       | Intron | Nonsplice Site |  |  | A | T |
| MRS2086152      | 63.732848 |       | Intron | Nonsplice Site |  |  | C | T |
| MRS2086153      | 63.732858 |       | Intron | Nonsplice Site |  |  | C | T |
| wt37-7-63733837 | 63.733837 |       | Intron | Nonsplice Site |  |  | C | T |
| wt37-7-63733849 | 63.733849 |       | Intron | Nonsplice Site |  |  | C | T |
| wt37-7-63733850 | 63.73385  |       | Intron | Nonsplice Site |  |  | A | G |
| wt37-7-63733890 | 63.73389  | 0.995 | Intron | Nonsplice Site |  |  | A | G |
| wt37-7-63734081 | 63.734081 | 0.995 | Intron | Nonsplice Site |  |  | T | C |

|                 |           |       |        |                |  |  |   |   |
|-----------------|-----------|-------|--------|----------------|--|--|---|---|
| wt37-7-63734425 | 63.734425 | 0.995 | Intron | Nonsplice Site |  |  | C | G |
| wt37-7-63734456 | 63.734456 | 0.995 | Intron | Nonsplice Site |  |  | G | A |
| wt37-7-63734530 | 63.73453  | 0.995 | Intron | Nonsplice Site |  |  | G | T |
| wt37-7-63734556 | 63.734556 | 0.995 | Intron | Nonsplice Site |  |  | G | A |
| wt37-7-63734565 | 63.734565 | 0.995 | Intron | Nonsplice Site |  |  | C | A |
| wt37-7-63735003 | 63.735003 |       | Intron | Nonsplice Site |  |  | T | A |
| wt37-7-63735060 | 63.73506  |       | Intron | Nonsplice Site |  |  | G | T |
| MRS2086165      | 63.735249 |       | Intron | Nonsplice Site |  |  | A | T |
| MRS2086166      | 63.735296 |       | Intron | Nonsplice Site |  |  | C | A |
| MRS2086167      | 63.735317 |       | Intron | Nonsplice Site |  |  | A | G |
| MRS2086168      | 63.73534  |       | Intron | Nonsplice Site |  |  | A | G |
| MRS2086169      | 63.735354 |       | Intron | Nonsplice Site |  |  | C | T |
| MRS2086170      | 63.735398 |       | Intron | Nonsplice Site |  |  | C | A |
| MRS2086171      | 63.735436 |       | Intron | Nonsplice Site |  |  | G | A |
| MRS2086172      | 63.735538 |       | Intron | Nonsplice Site |  |  | G | T |
| wt37-7-63736028 | 63.736028 | 0.488 | Intron | Nonsplice Site |  |  | G | C |
| wt37-7-63736147 | 63.736147 | 0.488 | Intron | Nonsplice Site |  |  | A | G |
| wt37-7-63736149 | 63.736149 | 0.488 | Intron | Nonsplice Site |  |  | A | G |
| wt37-7-63736322 | 63.736322 |       | Intron | Nonsplice Site |  |  | G | T |
| wt37-7-63736609 | 63.736609 |       | Intron | Nonsplice Site |  |  | C | T |
| wt37-7-63736677 | 63.736677 |       | Intron | Nonsplice Site |  |  | T | C |
| MRS2086177      | 63.736695 |       | Intron | Nonsplice Site |  |  | C | G |
| wt37-7-63737200 | 63.7372   |       | Intron | Nonsplice Site |  |  | T | C |
| wt37-7-63738817 | 63.738817 |       | Intron | Nonsplice Site |  |  | G | A |
| wt37-7-63738856 | 63.738856 |       | Intron | Nonsplice Site |  |  | A | G |
| wt37-7-63739035 | 63.739035 |       | Intron | Nonsplice Site |  |  | T | G |
| wt37-7-63739556 | 63.739556 |       | Intron | Nonsplice Site |  |  | A | G |

|                 |           |       |        |                |  |   |   |
|-----------------|-----------|-------|--------|----------------|--|---|---|
| wt37-7-63741564 | 63.741564 | 0.351 | Intron | Nonsplice Site |  | C | T |
| rs32093890      | 63.742094 |       | Intron | Nonsplice Site |  | C | T |
| wt37-7-63742106 | 63.742106 |       | Intron | Nonsplice Site |  | C | T |
| wt37-7-63742113 | 63.742113 |       | Intron | Nonsplice Site |  | T | C |
| wt37-7-63742678 | 63.742678 | 0.625 | Intron | Nonsplice Site |  | T | C |
| wt37-7-63742995 | 63.742995 |       | Intron | Nonsplice Site |  | G | A |
| wt37-7-63743229 | 63.743229 |       | Intron | Nonsplice Site |  | T | G |
| MRS2086187      | 63.743303 |       | Intron | Nonsplice Site |  | T | G |
| wt37-7-63743355 | 63.743355 |       | Intron | Nonsplice Site |  | A | G |
| wt37-7-63744467 | 63.744467 | 0.915 | Intron | Nonsplice Site |  | C | T |
| wt37-7-63745102 | 63.745102 | 0.612 | Intron | Nonsplice Site |  | G | C |
| wt37-7-63746954 | 63.746954 |       | Intron | Nonsplice Site |  | T | G |
| wt37-7-63747672 | 63.747672 |       | Intron | Nonsplice Site |  | C | T |
| wt37-7-63748222 | 63.748222 |       | Intron | Nonsplice Site |  | G | A |
| MRS2086194      | 63.750273 |       | Intron | Nonsplice Site |  | G | A |
| wt37-7-63751746 | 63.751746 |       | Intron | Nonsplice Site |  | C | A |
| wt37-7-63752812 | 63.752812 | 0.745 | Intron | Nonsplice Site |  | C | T |
| wt37-7-63755315 | 63.755315 | 0.97  | Intron | Nonsplice Site |  | G | C |
| wt37-7-63756180 | 63.75618  | 0.985 | Intron | Nonsplice Site |  | G | T |
| wt37-7-63756647 | 63.756647 | 0.985 | Intron | Nonsplice Site |  | C | T |
| rs31807960      | 63.757949 |       | Intron | Nonsplice Site |  | T | G |
| rs31822218      | 63.757952 |       | Intron | Nonsplice Site |  | T | G |
| wt37-7-63758147 | 63.758147 | 0.735 | Intron | Nonsplice Site |  | A | T |
| wt37-7-63758400 | 63.7584   | 0.735 | Intron | Nonsplice Site |  | A | G |
| rs32160858      | 63.759282 |       | Intron | Nonsplice Site |  | T | A |
| rs32988094      | 63.759958 |       | Intron | Nonsplice Site |  | A | T |
| wt37-7-63760527 | 63.760527 | 0.667 | Intron | Nonsplice Site |  | A | G |

|                 |           |       |         |                |               |                                                  |   |   |
|-----------------|-----------|-------|---------|----------------|---------------|--------------------------------------------------|---|---|
| MRS2086203      | 63.765178 | 0.374 | Intron  | Nonsplice Site |               |                                                  | C | A |
| wt37-7-63766747 | 63.766747 | 0.855 | Intron  | Nonsplice Site |               |                                                  | A | G |
| wt37-7-63774037 | 63.774037 | 0.515 | Intron  | Nonsplice Site |               |                                                  | A | G |
| MRS2086207      | 63.774264 | 0.515 | Intron  | Nonsplice Site |               |                                                  | G | A |
| wt37-7-63774866 | 63.774866 | 0.8   | Intron  | Nonsplice Site |               |                                                  | C | A |
| wt37-7-63775428 | 63.775428 | 0.36  | Intron  | Nonsplice Site |               |                                                  | C | T |
| wt37-7-63776055 | 63.776055 | 0.36  | Intron  | Nonsplice Site |               |                                                  | A | G |
| wt37-7-63776236 | 63.776236 | 0.36  | Intron  | Nonsplice Site |               |                                                  | A | T |
| wt37-7-63777544 | 63.777544 |       | Intron  | Nonsplice Site |               |                                                  | G | T |
| wt37-7-63778769 | 63.778769 | 0.522 | Intron  | Nonsplice Site |               |                                                  | G | A |
| wt37-7-63779192 | 63.779192 | 0.522 | Intron  | Nonsplice Site |               |                                                  | G | A |
| wt37-7-63779525 | 63.779525 | 0.522 | Intron  | Nonsplice Site |               |                                                  | A | C |
| MRS2086216      | 63.781514 | 0.814 | Intron  | Nonsplice Site |               |                                                  | G | T |
| wt37-7-63783402 | 63.783402 | 0.798 | Intron  | Nonsplice Site |               |                                                  | T | A |
| wt37-7-63784260 | 63.78426  |       | Intron  | Nonsplice Site |               |                                                  | G | A |
| wt37-7-63785970 | 63.78597  |       | Intron  | Nonsplice Site |               |                                                  | A | G |
| wt37-7-63786678 | 63.786678 |       | Intron  | Nonsplice Site |               |                                                  | C | T |
| MRS2086222      | 63.787416 |       | Intron  | Nonsplice Site |               |                                                  | C | T |
| wt37-7-63788078 | 63.788078 |       | Intron  | Nonsplice Site |               |                                                  | T | C |
| wt37-7-63788210 | 63.78821  |       | Intron  | Nonsplice Site |               |                                                  | T | A |
| wt37-7-63788643 | 63.788643 |       | Intron  | Nonsplice Site |               |                                                  | T | C |
| wt37-7-63788967 | 63.788967 | 0.747 | Intron  | Nonsplice Site |               |                                                  | T | G |
| MRS2086227      | 63.788968 | 0.747 | Intron  | Nonsplice Site |               |                                                  | G | T |
| MRS2086228      | 63.788969 | 0.747 | Intron  | Nonsplice Site |               |                                                  | T | G |
| wt37-7-63791328 | 63.791328 | 1     | Exon 24 | Coding         | Nonsynonymous | Biotype: Protein Coding, V -> M, Gtg -> Atg, 811 | G | A |
| wt37-7-63791511 | 63.791511 | 1     | Exon    | 3' UTR         |               |                                                  | C | T |
