# Supplementary material for: Genetic modulation of the iris transillumination defect: a systems genetics analysis using the expanded family of BXD glaucoma strains
Source: PubMed Central journal article supplement (PMC3752936; doi:10.1111/pcmr.12106), 2013-04-13
Supplement: pcmr0026-0487-SD5.pdf [file pcmr0026-0487-SD5.pdf]

**Appendix 5:** List of SNPs within *Myo5a*

| SNP ID          | Mb        | ConScore | Domain 1 | Domain 2       | Function | Details | B6 | D2 |
|-----------------|-----------|----------|----------|----------------|----------|---------|----|----|
| wt37-9-74928974 | 74.928974 | 0.82     | Intron   | Nonsplice Site |          |         | C  | T  |
| MRS2755623      | 74.93459  |          | Intron   | Nonsplice Site |          |         | C  | A  |
| MRS2755624      | 74.962261 |          | Intron   | Nonsplice Site |          |         | G  | A  |
| wt37-9-74970087 | 74.970087 | 1        | Intron   | Nonsplice Site |          |         | A  | G  |
| wt37-9-74973473 | 74.973473 | 0.776    | Intron   | Nonsplice Site |          |         | A  | G  |
| wt37-9-74974134 | 74.974134 | 0.972    | Intron   | Nonsplice Site |          |         | A  | G  |
| rs32945910      | 74.979146 |          | Intron   | Nonsplice Site |          |         | A  | G  |
| wt37-9-74982939 | 74.982939 | 0.923    | Intron   | Nonsplice Site |          |         | G  | A  |
| wt37-9-74985238 | 74.985238 | 0.992    | Intron   | Nonsplice Site |          |         | C  | A  |
| wt37-9-74992337 | 74.992337 | 1        | Intron   | Nonsplice Site |          |         | G  | A  |
| wt37-9-74993105 | 74.993105 | 0.586    | Intron   | Nonsplice Site |          |         | C  | T  |
| wt37-9-75013566 | 75.013566 | 1        | Intron   | Nonsplice Site |          |         | T  | C  |
| wt37-9-75016258 | 75.016258 | 1        | Intron   | Nonsplice Site |          |         | T  | A  |
| wt37-9-75026248 | 75.026248 | 0.491    | Intron   | Nonsplice Site |          |         | A  | T  |
| wt37-9-75034469 | 75.034469 | 1        | Intron   | Nonsplice Site |          |         | T  | C  |
| MRS2755637      | 75.035358 | 1        | Intron   | Nonsplice Site |          |         | T  | G  |
| MRS2755638      | 75.037585 | 1        | Intron   | Nonsplice Site |          |         | T  | C  |
| wt37-9-75039662 | 75.039662 |          | Intron   | Nonsplice Site |          |         | C  | A  |
| wt37-9-75039783 | 75.039783 | 1        | Intron   | Nonsplice Site |          |         | G  | C  |
| wt37-9-75050742 | 75.050742 | 0.677    | Intron   | Nonsplice Site |          |         | T  | C  |
| wt37-9-75053151 | 75.053151 | 0.855    | Intron   | Nonsplice Site |          |         | T  | A  |
| wt37-9-75053815 | 75.053815 | 0.92     | Intron   | Nonsplice Site |          |         | C  | T  |
| wt37-9-75061676 | 75.061676 | 0.475    | Intron   | Nonsplice Site |          |         | C  | T  |
| MRS2755645      | 75.061932 | 0.475    | Intron   | Nonsplice Site |          |         | G  | A  |
| wt37-9-75062374 | 75.062374 | 0.475    | Intron   | Nonsplice Site |          |         | T  | C  |
