# Supplementary material for: Genetic modulation of the iris transillumination defect: a systems genetics analysis using the expanded family of BXD glaucoma strains
Source: PubMed Central journal article supplement (PMC3752936; doi:10.1111/pcmr.12106), 2013-04-13
Supplement: pcmr0026-0487-SD6.pdf [file pcmr0026-0487-SD6.pdf]

**Appendix 6:** List of SNPs within *Prke2*

| SNP ID           | Mb         | ConScore | Domain 1 | Domain 2       | Function      | Details                                          | B6 | D2 |
|------------------|------------|----------|----------|----------------|---------------|--------------------------------------------------|----|----|
| wt37-4-154634448 | 154.634448 | 1        | Exon     | 3' UTR         |               |                                                  |    | C  |
| rs33152187       | 154.647859 |          | Intron   | Nonsplice Site |               |                                                  | G  |    |
| rs32123501       | 154.653871 |          | Intron   | Nonsplice Site |               |                                                  | T  | C  |
| wt37-4-154657047 | 154.657047 | 0.213    | Intron   | Nonsplice Site |               |                                                  |    | G  |
| rs33146997       | 154.660762 |          | Intron   | Nonsplice Site |               |                                                  |    | C  |
| rs33147836       | 154.660979 |          | Exon 7   | Coding         | Nonsynonymous | Biotype: Protein Coding, D -> V, gAc -> gTc, 112 | T  |    |
| wt37-4-154709187 | 154.709187 | 0.49     | Intron   | Nonsplice Site |               |                                                  | T  | C  |
| wt37-4-154713815 | 154.713815 | 0.397    | Intron   | Nonsplice Site |               |                                                  |    | T  |
| MRS1470012       | 154.713835 | 0.397    | Intron   | Nonsplice Site |               |                                                  | C  | T  |
| rs33155545       | 154.714496 |          | Intron   | Nonsplice Site |               |                                                  | C  |    |
| wt37-4-154734934 | 154.734934 | 1        | Intron   | Nonsplice Site |               |                                                  |    | T  |
